# Supplementary material for: Internet-Based Assessment of Oncology Health Care Professional Learning Style and Optimization of Materials for Web-Based Learning: Controlled Trial With Concealed Allocation
Source: PubMed Central journal article supplement (PMC5548983; doi:10.2196/jmir.7506), 2017-07-25
Supplement: jmir_v19i7e265_app4.pdf [file jmir_v19i7e265_app4.pdf]

## Multimedia Appendix 4

### Codebook for all surveys

Includes all branching logic.

| #                                        | Variable / Field Name | Field Label<br><i>Field Note</i>                                                                                                                                                                                                                                                                                                                                                                                                                                                                                                                                                                                                                                                                                                                                                                                                                                                                                                                                                                                                                                                                                                                                                                                                                  | Field Attributes (Field Type,<br>Validation, Choices, Calculations, etc.) |
|------------------------------------------|-----------------------|---------------------------------------------------------------------------------------------------------------------------------------------------------------------------------------------------------------------------------------------------------------------------------------------------------------------------------------------------------------------------------------------------------------------------------------------------------------------------------------------------------------------------------------------------------------------------------------------------------------------------------------------------------------------------------------------------------------------------------------------------------------------------------------------------------------------------------------------------------------------------------------------------------------------------------------------------------------------------------------------------------------------------------------------------------------------------------------------------------------------------------------------------------------------------------------------------------------------------------------------------|---------------------------------------------------------------------------|
| Instrument: <b>Learning Style Survey</b> |                       |                                                                                                                                                                                                                                                                                                                                                                                                                                                                                                                                                                                                                                                                                                                                                                                                                                                                                                                                                                                                                                                                                                                                                                                                                                                   |                                                                           |
| 1                                        | record_id             | Record ID                                                                                                                                                                                                                                                                                                                                                                                                                                                                                                                                                                                                                                                                                                                                                                                                                                                                                                                                                                                                                                                                                                                                                                                                                                         | text                                                                      |
| 2                                        | introduction          | <p>The My Cancer Genome team at Vanderbilt-Ingram Cancer Center (VICC) is conducting a study to improve cancer genetics web pages for oncology physicians and nurses. You are invited to participate in this oncology education program and survey about the concepts of sensitivity and resistance to targeted therapies for ER+ breast cancer.</p> <p>Here's how it works:<br/>           -- Answer a question about your preferred learning format and take a 10-question pre-test.<br/>           -- Take a look at the educational materials and answer a few questions.<br/>           -- In two weeks, answer a few follow-up questions, and fill out a form to receive your \$100 Amazon.com Gift Card.*</p> <p>Participating will take about 30 minutes. Your participation is totally voluntary and all responses will be confidential. There is very low risk to participating in this survey. You can choose not to answer all of the questions.</p> <p>Thank you so much for participating. If you have questions or comments contact us via email at <a href="mailto:mialevy.mycancergenome@vanderbilt.edu">mialevy.mycancergenome@vanderbilt.edu</a> or by phone by calling Christine Micheel, Ph.D. (study coordinator and My</p> | descriptive                                                               |

|   |                     |                                                                                                                                                                                                                                                                                                                                                                                                                         |                                                                                                                                                  |   |     |   |    |
|---|---------------------|-------------------------------------------------------------------------------------------------------------------------------------------------------------------------------------------------------------------------------------------------------------------------------------------------------------------------------------------------------------------------------------------------------------------------|--------------------------------------------------------------------------------------------------------------------------------------------------|---|-----|---|----|
|   |                     | <p>Cancer Genome managing editor), at 615-933-9368.</p> <p>Thank you,</p> <p>Mia Levy, MD, PhD</p> <p>Co-Editor in Chief, My Cancer Genome<br/> Assistant Professor of Biomedical Informatics and Medicine<br/> Vanderbilt University Medical Center<br/> 2220 Pierce Avenue<br/> 691 Preston Research Building<br/> Nashville, TN 37232-6838</p>                                                                       |                                                                                                                                                  |   |     |   |    |
| 3 | pin_number          | <p>What is the PIN number from your invitation email?<br/> <i>This 10-character code can be found in your invitation email. It is case sensitive. Please note that entries associated with incorrect PIN numbers will be ineligible for the \$100 Amazon gift card.</i></p>                                                                                                                                             | text, Required                                                                                                                                   |   |     |   |    |
| 4 | email               | <p>What is your email address?<br/> <i>Your email is required to complete the study and for your gift card. Your email will not be used for anything other than the study or after completion of the study.</i></p>                                                                                                                                                                                                     | text (email), Required, Identifier                                                                                                               |   |     |   |    |
| 5 | consent             | <p>I agree to participate in this study.</p>                                                                                                                                                                                                                                                                                                                                                                            | <p>yesno, Required</p> <table border="1"> <tr> <td>1</td> <td>Yes</td> </tr> <tr> <td>0</td> <td>No</td> </tr> </table> <p>Stop actions on 0</p> | 1 | Yes | 0 | No |
| 1 | Yes                 |                                                                                                                                                                                                                                                                                                                                                                                                                         |                                                                                                                                                  |   |     |   |    |
| 0 | No                  |                                                                                                                                                                                                                                                                                                                                                                                                                         |                                                                                                                                                  |   |     |   |    |
| 6 | amazon_disclaimer_1 | <p>*Amazon.com is not a sponsor of this promotion. Except as required by law, Amazon.com Gift Cards ("GCs") cannot be transferred for value or redeemed for cash. GCs may be used only for purchases of eligible goods at Amazon.com or certain of its affiliated websites. For complete terms and conditions, see <a href="http://www.amazon.com/gc-legal">www.amazon.com/gc-legal</a>. GCs are issued by ACI Gift</p> | descriptive                                                                                                                                      |   |     |   |    |

|    |                                                                             |                                                                                                                                              |                                                                                                                                                                                                                                                                                                                                                                                             |   |             |   |                     |   |                                        |   |                     |   |                        |   |             |   |                   |
|----|-----------------------------------------------------------------------------|----------------------------------------------------------------------------------------------------------------------------------------------|---------------------------------------------------------------------------------------------------------------------------------------------------------------------------------------------------------------------------------------------------------------------------------------------------------------------------------------------------------------------------------------------|---|-------------|---|---------------------|---|----------------------------------------|---|---------------------|---|------------------------|---|-------------|---|-------------------|
|    |                                                                             | Cards, Inc., a Washington corporation. All Amazon ®, ™ & © are IP of Amazon.com, Inc. or its affiliates. No expiration date or service fees. |                                                                                                                                                                                                                                                                                                                                                                                             |   |             |   |                     |   |                                        |   |                     |   |                        |   |             |   |                   |
| 7  | active_practice                                                             | Are you actively practicing in an oncology setting?                                                                                          | yesno, Required<br><table border="1"> <tr> <td>1</td> <td>Yes</td> </tr> <tr> <td>0</td> <td>No</td> </tr> </table>                                                                                                                                                                                                                                                                         | 1 | Yes         | 0 | No                  |   |                                        |   |                     |   |                        |   |             |   |                   |
| 1  | Yes                                                                         |                                                                                                                                              |                                                                                                                                                                                                                                                                                                                                                                                             |   |             |   |                     |   |                                        |   |                     |   |                        |   |             |   |                   |
| 0  | No                                                                          |                                                                                                                                              |                                                                                                                                                                                                                                                                                                                                                                                             |   |             |   |                     |   |                                        |   |                     |   |                        |   |             |   |                   |
| 8  | goodbye<br>Show the field ONLY if: [active_practice] = '0'                  | Only individuals actively practicing in an oncology setting are eligible to participate in this study. Thank you for your interest.          | descriptive                                                                                                                                                                                                                                                                                                                                                                                 |   |             |   |                     |   |                                        |   |                     |   |                        |   |             |   |                   |
| 9  | role_description<br>Show the field ONLY if: [active_practice] = '1'         | Which of the following best describes you?                                                                                                   | radio<br><table border="1"> <tr> <td>1</td> <td>Physician</td> </tr> <tr> <td>2</td> <td>Physician Assistant</td> </tr> <tr> <td>3</td> <td>Nurse</td> </tr> <tr> <td>4</td> <td>Genetic Counselor</td> </tr> <tr> <td>5</td> <td>Allied Health Provider</td> </tr> <tr> <td>6</td> <td>Other</td> </tr> </table>                                                                           | 1 | Physician   | 2 | Physician Assistant | 3 | Nurse                                  | 4 | Genetic Counselor   | 5 | Allied Health Provider | 6 | Other       |   |                   |
| 1  | Physician                                                                   |                                                                                                                                              |                                                                                                                                                                                                                                                                                                                                                                                             |   |             |   |                     |   |                                        |   |                     |   |                        |   |             |   |                   |
| 2  | Physician Assistant                                                         |                                                                                                                                              |                                                                                                                                                                                                                                                                                                                                                                                             |   |             |   |                     |   |                                        |   |                     |   |                        |   |             |   |                   |
| 3  | Nurse                                                                       |                                                                                                                                              |                                                                                                                                                                                                                                                                                                                                                                                             |   |             |   |                     |   |                                        |   |                     |   |                        |   |             |   |                   |
| 4  | Genetic Counselor                                                           |                                                                                                                                              |                                                                                                                                                                                                                                                                                                                                                                                             |   |             |   |                     |   |                                        |   |                     |   |                        |   |             |   |                   |
| 5  | Allied Health Provider                                                      |                                                                                                                                              |                                                                                                                                                                                                                                                                                                                                                                                             |   |             |   |                     |   |                                        |   |                     |   |                        |   |             |   |                   |
| 6  | Other                                                                       |                                                                                                                                              |                                                                                                                                                                                                                                                                                                                                                                                             |   |             |   |                     |   |                                        |   |                     |   |                        |   |             |   |                   |
| 10 | other_role<br>Show the field ONLY if: [role_description] = '6'              | Please explain:                                                                                                                              | text                                                                                                                                                                                                                                                                                                                                                                                        |   |             |   |                     |   |                                        |   |                     |   |                        |   |             |   |                   |
| 11 | physician_specialty<br>Show the field ONLY if: [role_description] = '1'     | Which of the following best describes you?                                                                                                   | radio<br><table border="1"> <tr> <td>1</td> <td>Resident</td> </tr> <tr> <td>2</td> <td>Fellow</td> </tr> <tr> <td>3</td> <td>Medical oncologist and/or hematologist</td> </tr> <tr> <td>4</td> <td>Surgical oncologist</td> </tr> <tr> <td>5</td> <td>Radiation oncologist</td> </tr> <tr> <td>6</td> <td>Pathologist</td> </tr> <tr> <td>7</td> <td>None of the above</td> </tr> </table> | 1 | Resident    | 2 | Fellow              | 3 | Medical oncologist and/or hematologist | 4 | Surgical oncologist | 5 | Radiation oncologist   | 6 | Pathologist | 7 | None of the above |
| 1  | Resident                                                                    |                                                                                                                                              |                                                                                                                                                                                                                                                                                                                                                                                             |   |             |   |                     |   |                                        |   |                     |   |                        |   |             |   |                   |
| 2  | Fellow                                                                      |                                                                                                                                              |                                                                                                                                                                                                                                                                                                                                                                                             |   |             |   |                     |   |                                        |   |                     |   |                        |   |             |   |                   |
| 3  | Medical oncologist and/or hematologist                                      |                                                                                                                                              |                                                                                                                                                                                                                                                                                                                                                                                             |   |             |   |                     |   |                                        |   |                     |   |                        |   |             |   |                   |
| 4  | Surgical oncologist                                                         |                                                                                                                                              |                                                                                                                                                                                                                                                                                                                                                                                             |   |             |   |                     |   |                                        |   |                     |   |                        |   |             |   |                   |
| 5  | Radiation oncologist                                                        |                                                                                                                                              |                                                                                                                                                                                                                                                                                                                                                                                             |   |             |   |                     |   |                                        |   |                     |   |                        |   |             |   |                   |
| 6  | Pathologist                                                                 |                                                                                                                                              |                                                                                                                                                                                                                                                                                                                                                                                             |   |             |   |                     |   |                                        |   |                     |   |                        |   |             |   |                   |
| 7  | None of the above                                                           |                                                                                                                                              |                                                                                                                                                                                                                                                                                                                                                                                             |   |             |   |                     |   |                                        |   |                     |   |                        |   |             |   |                   |
| 12 | md_none_of_the_above<br>Show the field ONLY if: [physician_specialty] = '7' | If you marked none of the above, please explain.                                                                                             | text                                                                                                                                                                                                                                                                                                                                                                                        |   |             |   |                     |   |                                        |   |                     |   |                        |   |             |   |                   |
| 13 | residency_fellowship<br>Show the field ONLY if: [role_description] = '1'    | How many years has it been since you completed residency/fellowship?                                                                         | radio<br><table border="1"> <tr> <td>1</td> <td>Less than 5</td> </tr> <tr> <td>2</td> <td>5-9</td> </tr> <tr> <td>3</td> <td>10-15</td> </tr> <tr> <td>4</td> <td>Greater than 15</td> </tr> </table>                                                                                                                                                                                      | 1 | Less than 5 | 2 | 5-9                 | 3 | 10-15                                  | 4 | Greater than 15     |   |                        |   |             |   |                   |
| 1  | Less than 5                                                                 |                                                                                                                                              |                                                                                                                                                                                                                                                                                                                                                                                             |   |             |   |                     |   |                                        |   |                     |   |                        |   |             |   |                   |
| 2  | 5-9                                                                         |                                                                                                                                              |                                                                                                                                                                                                                                                                                                                                                                                             |   |             |   |                     |   |                                        |   |                     |   |                        |   |             |   |                   |
| 3  | 10-15                                                                       |                                                                                                                                              |                                                                                                                                                                                                                                                                                                                                                                                             |   |             |   |                     |   |                                        |   |                     |   |                        |   |             |   |                   |
| 4  | Greater than 15                                                             |                                                                                                                                              |                                                                                                                                                                                                                                                                                                                                                                                             |   |             |   |                     |   |                                        |   |                     |   |                        |   |             |   |                   |

|                                       |                                                                       |                                                                                                                                                                                                                                                 |                                                                                                                                                                                                                                                                                                                                                                                                                                                                                                  |     |                       |     |                                      |     |                                          |     |                                         |     |                                    |     |                                      |     |                                                |
|---------------------------------------|-----------------------------------------------------------------------|-------------------------------------------------------------------------------------------------------------------------------------------------------------------------------------------------------------------------------------------------|--------------------------------------------------------------------------------------------------------------------------------------------------------------------------------------------------------------------------------------------------------------------------------------------------------------------------------------------------------------------------------------------------------------------------------------------------------------------------------------------------|-----|-----------------------|-----|--------------------------------------|-----|------------------------------------------|-----|-----------------------------------------|-----|------------------------------------|-----|--------------------------------------|-----|------------------------------------------------|
|                                       |                                                                       |                                                                                                                                                                                                                                                 | 5   N/A                                                                                                                                                                                                                                                                                                                                                                                                                                                                                          |     |                       |     |                                      |     |                                          |     |                                         |     |                                    |     |                                      |     |                                                |
| 14                                    | learning_styles<br>Show the field ONLY if:<br>[active_practice] = '1' | I am likely to remember something a year from now if:                                                                                                                                                                                           | radio, Required<br><table border="1"> <tr><td>100</td><td>I learn it by reading</td></tr> <tr><td>010</td><td>I learn it by listening</td></tr> <tr><td>001</td><td>I learn it by watching</td></tr> <tr><td>110</td><td>I learn it by reading and listening</td></tr> <tr><td>101</td><td>I learn it by reading and watching</td></tr> <tr><td>011</td><td>I learn it by listening and watching</td></tr> <tr><td>111</td><td>I learn it by reading, listening, and watching</td></tr> </table> | 100 | I learn it by reading | 010 | I learn it by listening              | 001 | I learn it by watching                   | 110 | I learn it by reading and listening     | 101 | I learn it by reading and watching | 011 | I learn it by listening and watching | 111 | I learn it by reading, listening, and watching |
| 100                                   | I learn it by reading                                                 |                                                                                                                                                                                                                                                 |                                                                                                                                                                                                                                                                                                                                                                                                                                                                                                  |     |                       |     |                                      |     |                                          |     |                                         |     |                                    |     |                                      |     |                                                |
| 010                                   | I learn it by listening                                               |                                                                                                                                                                                                                                                 |                                                                                                                                                                                                                                                                                                                                                                                                                                                                                                  |     |                       |     |                                      |     |                                          |     |                                         |     |                                    |     |                                      |     |                                                |
| 001                                   | I learn it by watching                                                |                                                                                                                                                                                                                                                 |                                                                                                                                                                                                                                                                                                                                                                                                                                                                                                  |     |                       |     |                                      |     |                                          |     |                                         |     |                                    |     |                                      |     |                                                |
| 110                                   | I learn it by reading and listening                                   |                                                                                                                                                                                                                                                 |                                                                                                                                                                                                                                                                                                                                                                                                                                                                                                  |     |                       |     |                                      |     |                                          |     |                                         |     |                                    |     |                                      |     |                                                |
| 101                                   | I learn it by reading and watching                                    |                                                                                                                                                                                                                                                 |                                                                                                                                                                                                                                                                                                                                                                                                                                                                                                  |     |                       |     |                                      |     |                                          |     |                                         |     |                                    |     |                                      |     |                                                |
| 011                                   | I learn it by listening and watching                                  |                                                                                                                                                                                                                                                 |                                                                                                                                                                                                                                                                                                                                                                                                                                                                                                  |     |                       |     |                                      |     |                                          |     |                                         |     |                                    |     |                                      |     |                                                |
| 111                                   | I learn it by reading, listening, and watching                        |                                                                                                                                                                                                                                                 |                                                                                                                                                                                                                                                                                                                                                                                                                                                                                                  |     |                       |     |                                      |     |                                          |     |                                         |     |                                    |     |                                      |     |                                                |
| 15                                    | learning_style_survey_complete                                        | Complete?                                                                                                                                                                                                                                       | dropdown<br><table border="1"> <tr><td>0</td><td>Incomplete</td></tr> <tr><td>1</td><td>Unverified</td></tr> <tr><td>2</td><td>Complete</td></tr> </table>                                                                                                                                                                                                                                                                                                                                       | 0   | Incomplete            | 1   | Unverified                           | 2   | Complete                                 |     |                                         |     |                                    |     |                                      |     |                                                |
| 0                                     | Incomplete                                                            |                                                                                                                                                                                                                                                 |                                                                                                                                                                                                                                                                                                                                                                                                                                                                                                  |     |                       |     |                                      |     |                                          |     |                                         |     |                                    |     |                                      |     |                                                |
| 1                                     | Unverified                                                            |                                                                                                                                                                                                                                                 |                                                                                                                                                                                                                                                                                                                                                                                                                                                                                                  |     |                       |     |                                      |     |                                          |     |                                         |     |                                    |     |                                      |     |                                                |
| 2                                     | Complete                                                              |                                                                                                                                                                                                                                                 |                                                                                                                                                                                                                                                                                                                                                                                                                                                                                                  |     |                       |     |                                      |     |                                          |     |                                         |     |                                    |     |                                      |     |                                                |
| Instrument: <b>Knowledge Pre-Test</b> |                                                                       |                                                                                                                                                                                                                                                 |                                                                                                                                                                                                                                                                                                                                                                                                                                                                                                  |     |                       |     |                                      |     |                                          |     |                                         |     |                                    |     |                                      |     |                                                |
| 16                                    | pretest_rb1                                                           | Phosphorylation of RB1 facilitates which of the following:                                                                                                                                                                                      | radio, Required<br><table border="1"> <tr><td>20</td><td>Tumor suppression</td></tr> <tr><td>21</td><td>Inhibition of cell cycle progression</td></tr> <tr><td>22</td><td>Entry into the S phase of the cell cycle</td></tr> <tr><td>23</td><td>Formation of a Cyclin D1-CDK4/6 complex</td></tr> <tr><td>100</td><td>Don't know</td></tr> </table>                                                                                                                                              | 20  | Tumor suppression     | 21  | Inhibition of cell cycle progression | 22  | Entry into the S phase of the cell cycle | 23  | Formation of a Cyclin D1-CDK4/6 complex | 100 | Don't know                         |     |                                      |     |                                                |
| 20                                    | Tumor suppression                                                     |                                                                                                                                                                                                                                                 |                                                                                                                                                                                                                                                                                                                                                                                                                                                                                                  |     |                       |     |                                      |     |                                          |     |                                         |     |                                    |     |                                      |     |                                                |
| 21                                    | Inhibition of cell cycle progression                                  |                                                                                                                                                                                                                                                 |                                                                                                                                                                                                                                                                                                                                                                                                                                                                                                  |     |                       |     |                                      |     |                                          |     |                                         |     |                                    |     |                                      |     |                                                |
| 22                                    | Entry into the S phase of the cell cycle                              |                                                                                                                                                                                                                                                 |                                                                                                                                                                                                                                                                                                                                                                                                                                                                                                  |     |                       |     |                                      |     |                                          |     |                                         |     |                                    |     |                                      |     |                                                |
| 23                                    | Formation of a Cyclin D1-CDK4/6 complex                               |                                                                                                                                                                                                                                                 |                                                                                                                                                                                                                                                                                                                                                                                                                                                                                                  |     |                       |     |                                      |     |                                          |     |                                         |     |                                    |     |                                      |     |                                                |
| 100                                   | Don't know                                                            |                                                                                                                                                                                                                                                 |                                                                                                                                                                                                                                                                                                                                                                                                                                                                                                  |     |                       |     |                                      |     |                                          |     |                                         |     |                                    |     |                                      |     |                                                |
| 17                                    | pretest_acquired_definition                                           | Acquired resistance to endocrine therapy in ER+ breast cancer is defined as recurrence at least 6-12 months after completion of adjuvant therapy or disease progression > 6 months after endocrine therapy initiated in the metastatic setting. | radio, Required<br><table border="1"> <tr><td>1</td><td>True</td></tr> <tr><td>0</td><td>False</td></tr> <tr><td>100</td><td>Don't know</td></tr> </table>                                                                                                                                                                                                                                                                                                                                       | 1   | True                  | 0   | False                                | 100 | Don't know                               |     |                                         |     |                                    |     |                                      |     |                                                |
| 1                                     | True                                                                  |                                                                                                                                                                                                                                                 |                                                                                                                                                                                                                                                                                                                                                                                                                                                                                                  |     |                       |     |                                      |     |                                          |     |                                         |     |                                    |     |                                      |     |                                                |
| 0                                     | False                                                                 |                                                                                                                                                                                                                                                 |                                                                                                                                                                                                                                                                                                                                                                                                                                                                                                  |     |                       |     |                                      |     |                                          |     |                                         |     |                                    |     |                                      |     |                                                |
| 100                                   | Don't know                                                            |                                                                                                                                                                                                                                                 |                                                                                                                                                                                                                                                                                                                                                                                                                                                                                                  |     |                       |     |                                      |     |                                          |     |                                         |     |                                    |     |                                      |     |                                                |
| 18                                    | pretest_primary_definition                                            | Please fill in the blank with the correct answer. Primary resistance to endocrine therapy in ER+ breast cancer has been defined as disease progression less than ____ months after treatment in the metastatic setting.                         | radio, Required<br><table border="1"> <tr><td>12</td><td>12</td></tr> <tr><td>10</td><td>10</td></tr> <tr><td>8</td><td>8</td></tr> <tr><td>6</td><td>6</td></tr> </table>                                                                                                                                                                                                                                                                                                                       | 12  | 12                    | 10  | 10                                   | 8   | 8                                        | 6   | 6                                       |     |                                    |     |                                      |     |                                                |
| 12                                    | 12                                                                    |                                                                                                                                                                                                                                                 |                                                                                                                                                                                                                                                                                                                                                                                                                                                                                                  |     |                       |     |                                      |     |                                          |     |                                         |     |                                    |     |                                      |     |                                                |
| 10                                    | 10                                                                    |                                                                                                                                                                                                                                                 |                                                                                                                                                                                                                                                                                                                                                                                                                                                                                                  |     |                       |     |                                      |     |                                          |     |                                         |     |                                    |     |                                      |     |                                                |
| 8                                     | 8                                                                     |                                                                                                                                                                                                                                                 |                                                                                                                                                                                                                                                                                                                                                                                                                                                                                                  |     |                       |     |                                      |     |                                          |     |                                         |     |                                    |     |                                      |     |                                                |
| 6                                     | 6                                                                     |                                                                                                                                                                                                                                                 |                                                                                                                                                                                                                                                                                                                                                                                                                                                                                                  |     |                       |     |                                      |     |                                          |     |                                         |     |                                    |     |                                      |     |                                                |

|    |                             |                                                                                                                                                                                                     |                 |                                                |
|----|-----------------------------|-----------------------------------------------------------------------------------------------------------------------------------------------------------------------------------------------------|-----------------|------------------------------------------------|
|    |                             |                                                                                                                                                                                                     | 100             | Don't know                                     |
| 19 | pretest_estrogen            | Estrogen is a steroid hormone that controls cell processes like cell division, growth, differentiation, and proliferation.                                                                          | radio, Required |                                                |
|    |                             |                                                                                                                                                                                                     | 1               | True                                           |
|    |                             |                                                                                                                                                                                                     | 0               | False                                          |
|    |                             |                                                                                                                                                                                                     | 100             | Don't know                                     |
| 20 | pretest_primary_mechanisms  | Which of the following is a way primary resistance to endocrine therapy in estrogen receptor-positive (ER+) breast cancer may occur?                                                                | radio, Required |                                                |
|    |                             |                                                                                                                                                                                                     | 30              | Estrogen receptor (ER) amplification           |
|    |                             |                                                                                                                                                                                                     | 31              | Cyclin D1 amplification                        |
|    |                             |                                                                                                                                                                                                     | 32              | RB1 amplification                              |
|    |                             |                                                                                                                                                                                                     | 300             | None of the above                              |
|    |                             |                                                                                                                                                                                                     | 100             | Don't know                                     |
| 21 | pretest_acquired_mechanisms | Which of the following are ways acquired resistance to endocrine therapy in ER+ breast may occur?                                                                                                   | radio, Required |                                                |
|    |                             |                                                                                                                                                                                                     | 40              | Activation of growth factor signaling pathways |
|    |                             |                                                                                                                                                                                                     | 41              | Changes in the tumor microenvironment          |
|    |                             |                                                                                                                                                                                                     | 42              | Estrogen receptor mutations                    |
|    |                             |                                                                                                                                                                                                     | 200             | All of the above                               |
|    |                             |                                                                                                                                                                                                     | 100             | Don't know                                     |
| 22 | pretest_fda_approved        | Which drug combination is FDA-approved to treat ER+ metastatic breast cancer resistant to letrozole or anastrozole?                                                                                 | radio, Required |                                                |
|    |                             |                                                                                                                                                                                                     | 50              | Everolimus + exemestane                        |
|    |                             |                                                                                                                                                                                                     | 51              | Erlotinib + exemestane                         |
|    |                             |                                                                                                                                                                                                     | 52              | Palbociclib + exemestane                       |
|    |                             |                                                                                                                                                                                                     | 53              | Bevacizumab + exemestane                       |
|    |                             |                                                                                                                                                                                                     | 100             | Don't know                                     |
| 23 | pretest_cdk46_settings      | CDK4/6 inhibitors have only been evaluated in the first line setting in breast cancer.                                                                                                              | radio, Required |                                                |
|    |                             |                                                                                                                                                                                                     | 1               | True                                           |
|    |                             |                                                                                                                                                                                                     | 0               | False                                          |
|    |                             |                                                                                                                                                                                                     | 100             | Don't know                                     |
| 24 | pretest_fda_accelerated     | The FDA granted accelerated approval of which of the following drug combinations for first line or initial endocrine therapy in postmenopausal women with ER+/HER2-negative advanced breast cancer? | radio, Required |                                                |
|    |                             |                                                                                                                                                                                                     | 60              | Palbociclib + letrozole                        |
|    |                             |                                                                                                                                                                                                     | 61              | Erlotinib + letrozole                          |
|    |                             |                                                                                                                                                                                                     | 62              | Bevacizumab + letrozole                        |
|    |                             |                                                                                                                                                                                                     | 63              | Everolimus + letrozole                         |

|                                               |                                             |                                                                                                                                                                                                                                                                                                                                                                                                                                                                                                                                                                                                                                                                                                                                                 |                                                                                                                                                                                                                                                                                           |     |                 |    |                   |    |                 |    |                 |     |            |
|-----------------------------------------------|---------------------------------------------|-------------------------------------------------------------------------------------------------------------------------------------------------------------------------------------------------------------------------------------------------------------------------------------------------------------------------------------------------------------------------------------------------------------------------------------------------------------------------------------------------------------------------------------------------------------------------------------------------------------------------------------------------------------------------------------------------------------------------------------------------|-------------------------------------------------------------------------------------------------------------------------------------------------------------------------------------------------------------------------------------------------------------------------------------------|-----|-----------------|----|-------------------|----|-----------------|----|-----------------|-----|------------|
|                                               |                                             |                                                                                                                                                                                                                                                                                                                                                                                                                                                                                                                                                                                                                                                                                                                                                 | <table border="1"> <tr> <td>100</td> <td>Don't know</td> </tr> </table>                                                                                                                                                                                                                   | 100 | Don't know      |    |                   |    |                 |    |                 |     |            |
| 100                                           | Don't know                                  |                                                                                                                                                                                                                                                                                                                                                                                                                                                                                                                                                                                                                                                                                                                                                 |                                                                                                                                                                                                                                                                                           |     |                 |    |                   |    |                 |    |                 |     |            |
| 25                                            | pretest_palbociclib                         | Palbociclib is in which of the following drug classes?                                                                                                                                                                                                                                                                                                                                                                                                                                                                                                                                                                                                                                                                                          | radio, Required <table border="1"> <tr> <td>70</td> <td>mTOR inhibitors</td> </tr> <tr> <td>71</td> <td>CDK4/6 inhibitors</td> </tr> <tr> <td>72</td> <td>PI3K inhibitors</td> </tr> <tr> <td>73</td> <td>EGFR inhibitors</td> </tr> <tr> <td>100</td> <td>Don't know</td> </tr> </table> | 70  | mTOR inhibitors | 71 | CDK4/6 inhibitors | 72 | PI3K inhibitors | 73 | EGFR inhibitors | 100 | Don't know |
| 70                                            | mTOR inhibitors                             |                                                                                                                                                                                                                                                                                                                                                                                                                                                                                                                                                                                                                                                                                                                                                 |                                                                                                                                                                                                                                                                                           |     |                 |    |                   |    |                 |    |                 |     |            |
| 71                                            | CDK4/6 inhibitors                           |                                                                                                                                                                                                                                                                                                                                                                                                                                                                                                                                                                                                                                                                                                                                                 |                                                                                                                                                                                                                                                                                           |     |                 |    |                   |    |                 |    |                 |     |            |
| 72                                            | PI3K inhibitors                             |                                                                                                                                                                                                                                                                                                                                                                                                                                                                                                                                                                                                                                                                                                                                                 |                                                                                                                                                                                                                                                                                           |     |                 |    |                   |    |                 |    |                 |     |            |
| 73                                            | EGFR inhibitors                             |                                                                                                                                                                                                                                                                                                                                                                                                                                                                                                                                                                                                                                                                                                                                                 |                                                                                                                                                                                                                                                                                           |     |                 |    |                   |    |                 |    |                 |     |            |
| 100                                           | Don't know                                  |                                                                                                                                                                                                                                                                                                                                                                                                                                                                                                                                                                                                                                                                                                                                                 |                                                                                                                                                                                                                                                                                           |     |                 |    |                   |    |                 |    |                 |     |            |
| 26                                            | prelearning_material_review_survey_complete | Complete?                                                                                                                                                                                                                                                                                                                                                                                                                                                                                                                                                                                                                                                                                                                                       | dropdown <table border="1"> <tr> <td>0</td> <td>Incomplete</td> </tr> <tr> <td>1</td> <td>Unverified</td> </tr> <tr> <td>2</td> <td>Complete</td> </tr> </table>                                                                                                                          | 0   | Incomplete      | 1  | Unverified        | 2  | Complete        |    |                 |     |            |
| 0                                             | Incomplete                                  |                                                                                                                                                                                                                                                                                                                                                                                                                                                                                                                                                                                                                                                                                                                                                 |                                                                                                                                                                                                                                                                                           |     |                 |    |                   |    |                 |    |                 |     |            |
| 1                                             | Unverified                                  |                                                                                                                                                                                                                                                                                                                                                                                                                                                                                                                                                                                                                                                                                                                                                 |                                                                                                                                                                                                                                                                                           |     |                 |    |                   |    |                 |    |                 |     |            |
| 2                                             | Complete                                    |                                                                                                                                                                                                                                                                                                                                                                                                                                                                                                                                                                                                                                                                                                                                                 |                                                                                                                                                                                                                                                                                           |     |                 |    |                   |    |                 |    |                 |     |            |
| <b>Instrument: Link to Learning Materials</b> |                                             |                                                                                                                                                                                                                                                                                                                                                                                                                                                                                                                                                                                                                                                                                                                                                 |                                                                                                                                                                                                                                                                                           |     |                 |    |                   |    |                 |    |                 |     |            |
| 27                                            | learning_materials_link                     | Please click on the link below to view your learning materials:<br><br>Link to Learning Materials ( <a href="http://www.mycancergenome.org/learning-material/?record=[enrollment_arm_1][record_id]&amp;ls=[enrollment_arm_1][learning_styles]&amp;pin=[enrollment_arm_1][pin_number]">http://www.mycancergenome.org/learning-material/?record=[enrollment_arm_1][record_id]&amp;ls=[enrollment_arm_1][learning_styles]&amp;pin=[enrollment_arm_1][pin_number]</a> )<br><br>When you are finished reviewing your learning materials, click the submit button below. You will be taken to a page with a link to the "Post-Learning Material Review Survey."<br><br>You should also be receiving this link and a link to the next survey by email. | descriptive                                                                                                                                                                                                                                                                               |     |                 |    |                   |    |                 |    |                 |     |            |
| 28                                            | link_to_learning_materials_complete         | Complete?                                                                                                                                                                                                                                                                                                                                                                                                                                                                                                                                                                                                                                                                                                                                       | dropdown <table border="1"> <tr> <td>0</td> <td>Incomplete</td> </tr> <tr> <td>1</td> <td>Unverified</td> </tr> <tr> <td>2</td> <td>Complete</td> </tr> </table>                                                                                                                          | 0   | Incomplete      | 1  | Unverified        | 2  | Complete        |    |                 |     |            |
| 0                                             | Incomplete                                  |                                                                                                                                                                                                                                                                                                                                                                                                                                                                                                                                                                                                                                                                                                                                                 |                                                                                                                                                                                                                                                                                           |     |                 |    |                   |    |                 |    |                 |     |            |
| 1                                             | Unverified                                  |                                                                                                                                                                                                                                                                                                                                                                                                                                                                                                                                                                                                                                                                                                                                                 |                                                                                                                                                                                                                                                                                           |     |                 |    |                   |    |                 |    |                 |     |            |
| 2                                             | Complete                                    |                                                                                                                                                                                                                                                                                                                                                                                                                                                                                                                                                                                                                                                                                                                                                 |                                                                                                                                                                                                                                                                                           |     |                 |    |                   |    |                 |    |                 |     |            |
| <b>Instrument: Knowledge Post-Test</b>        |                                             |                                                                                                                                                                                                                                                                                                                                                                                                                                                                                                                                                                                                                                                                                                                                                 |                                                                                                                                                                                                                                                                                           |     |                 |    |                   |    |                 |    |                 |     |            |
| 29                                            | posttest_palbociclib                        | Palbociclib is in which of the following drug classes?                                                                                                                                                                                                                                                                                                                                                                                                                                                                                                                                                                                                                                                                                          | radio, Required <table border="1"> <tr> <td>72</td> <td>PI3K inhibitors</td> </tr> </table>                                                                                                                                                                                               | 72  | PI3K inhibitors |    |                   |    |                 |    |                 |     |            |
| 72                                            | PI3K inhibitors                             |                                                                                                                                                                                                                                                                                                                                                                                                                                                                                                                                                                                                                                                                                                                                                 |                                                                                                                                                                                                                                                                                           |     |                 |    |                   |    |                 |    |                 |     |            |

|     |                                                |                                                                                                                                                                                                                                                 |                                                                                                                                                                                                                                                                                                                                                            |    |                             |    |                                                |     |                                       |     |                        |     |            |
|-----|------------------------------------------------|-------------------------------------------------------------------------------------------------------------------------------------------------------------------------------------------------------------------------------------------------|------------------------------------------------------------------------------------------------------------------------------------------------------------------------------------------------------------------------------------------------------------------------------------------------------------------------------------------------------------|----|-----------------------------|----|------------------------------------------------|-----|---------------------------------------|-----|------------------------|-----|------------|
|     |                                                |                                                                                                                                                                                                                                                 | <table border="1"> <tr> <td>70</td> <td>mTOR inhibitors</td> </tr> <tr> <td>71</td> <td>CDK4/6 inhibitors</td> </tr> <tr> <td>73</td> <td>EGFR inhibitors</td> </tr> <tr> <td>100</td> <td>Don't know</td> </tr> </table>                                                                                                                                  | 70 | mTOR inhibitors             | 71 | CDK4/6 inhibitors                              | 73  | EGFR inhibitors                       | 100 | Don't know             |     |            |
| 70  | mTOR inhibitors                                |                                                                                                                                                                                                                                                 |                                                                                                                                                                                                                                                                                                                                                            |    |                             |    |                                                |     |                                       |     |                        |     |            |
| 71  | CDK4/6 inhibitors                              |                                                                                                                                                                                                                                                 |                                                                                                                                                                                                                                                                                                                                                            |    |                             |    |                                                |     |                                       |     |                        |     |            |
| 73  | EGFR inhibitors                                |                                                                                                                                                                                                                                                 |                                                                                                                                                                                                                                                                                                                                                            |    |                             |    |                                                |     |                                       |     |                        |     |            |
| 100 | Don't know                                     |                                                                                                                                                                                                                                                 |                                                                                                                                                                                                                                                                                                                                                            |    |                             |    |                                                |     |                                       |     |                        |     |            |
| 30  | posttest_cdk46_settings                        | CDK4/6 inhibitors have only been evaluated in the first line setting in breast cancer.                                                                                                                                                          | radio, Required <table border="1"> <tr> <td>1</td> <td>True</td> </tr> <tr> <td>0</td> <td>False</td> </tr> <tr> <td>100</td> <td>Don't know</td> </tr> </table>                                                                                                                                                                                           | 1  | True                        | 0  | False                                          | 100 | Don't know                            |     |                        |     |            |
| 1   | True                                           |                                                                                                                                                                                                                                                 |                                                                                                                                                                                                                                                                                                                                                            |    |                             |    |                                                |     |                                       |     |                        |     |            |
| 0   | False                                          |                                                                                                                                                                                                                                                 |                                                                                                                                                                                                                                                                                                                                                            |    |                             |    |                                                |     |                                       |     |                        |     |            |
| 100 | Don't know                                     |                                                                                                                                                                                                                                                 |                                                                                                                                                                                                                                                                                                                                                            |    |                             |    |                                                |     |                                       |     |                        |     |            |
| 31  | posttest_acquired_mechanisms                   | Which of the following are ways acquired resistance to endocrine therapy in ER+ breast may occur?                                                                                                                                               | radio, Required <table border="1"> <tr> <td>42</td> <td>Estrogen receptor mutations</td> </tr> <tr> <td>40</td> <td>Activation of growth factor signaling pathways</td> </tr> <tr> <td>41</td> <td>Changes in the tumor microenvironment</td> </tr> <tr> <td>200</td> <td>All of the above</td> </tr> <tr> <td>100</td> <td>Don't know</td> </tr> </table> | 42 | Estrogen receptor mutations | 40 | Activation of growth factor signaling pathways | 41  | Changes in the tumor microenvironment | 200 | All of the above       | 100 | Don't know |
| 42  | Estrogen receptor mutations                    |                                                                                                                                                                                                                                                 |                                                                                                                                                                                                                                                                                                                                                            |    |                             |    |                                                |     |                                       |     |                        |     |            |
| 40  | Activation of growth factor signaling pathways |                                                                                                                                                                                                                                                 |                                                                                                                                                                                                                                                                                                                                                            |    |                             |    |                                                |     |                                       |     |                        |     |            |
| 41  | Changes in the tumor microenvironment          |                                                                                                                                                                                                                                                 |                                                                                                                                                                                                                                                                                                                                                            |    |                             |    |                                                |     |                                       |     |                        |     |            |
| 200 | All of the above                               |                                                                                                                                                                                                                                                 |                                                                                                                                                                                                                                                                                                                                                            |    |                             |    |                                                |     |                                       |     |                        |     |            |
| 100 | Don't know                                     |                                                                                                                                                                                                                                                 |                                                                                                                                                                                                                                                                                                                                                            |    |                             |    |                                                |     |                                       |     |                        |     |            |
| 32  | posttest_acquired_definition                   | Acquired resistance to endocrine therapy in ER+ breast cancer is defined as recurrence at least 6-12 months after completion of adjuvant therapy or disease progression > 6 months after endocrine therapy initiated in the metastatic setting. | radio, Required <table border="1"> <tr> <td>1</td> <td>True</td> </tr> <tr> <td>0</td> <td>False</td> </tr> <tr> <td>100</td> <td>Don't know</td> </tr> </table>                                                                                                                                                                                           | 1  | True                        | 0  | False                                          | 100 | Don't know                            |     |                        |     |            |
| 1   | True                                           |                                                                                                                                                                                                                                                 |                                                                                                                                                                                                                                                                                                                                                            |    |                             |    |                                                |     |                                       |     |                        |     |            |
| 0   | False                                          |                                                                                                                                                                                                                                                 |                                                                                                                                                                                                                                                                                                                                                            |    |                             |    |                                                |     |                                       |     |                        |     |            |
| 100 | Don't know                                     |                                                                                                                                                                                                                                                 |                                                                                                                                                                                                                                                                                                                                                            |    |                             |    |                                                |     |                                       |     |                        |     |            |
| 33  | posttest_fda_approved                          | Which drug combination is FDA-approved to treat ER+ metastatic breast cancer resistant to letrozole or anastrozole?                                                                                                                             | radio, Required <table border="1"> <tr> <td>53</td> <td>Bevacizumab + exemestane</td> </tr> <tr> <td>50</td> <td>Everolimus + exemestane</td> </tr> <tr> <td>52</td> <td>Palbociclib + exemestane</td> </tr> <tr> <td>51</td> <td>Erlotinib + exemestane</td> </tr> <tr> <td>100</td> <td>Don't know</td> </tr> </table>                                   | 53 | Bevacizumab + exemestane    | 50 | Everolimus + exemestane                        | 52  | Palbociclib + exemestane              | 51  | Erlotinib + exemestane | 100 | Don't know |
| 53  | Bevacizumab + exemestane                       |                                                                                                                                                                                                                                                 |                                                                                                                                                                                                                                                                                                                                                            |    |                             |    |                                                |     |                                       |     |                        |     |            |
| 50  | Everolimus + exemestane                        |                                                                                                                                                                                                                                                 |                                                                                                                                                                                                                                                                                                                                                            |    |                             |    |                                                |     |                                       |     |                        |     |            |
| 52  | Palbociclib + exemestane                       |                                                                                                                                                                                                                                                 |                                                                                                                                                                                                                                                                                                                                                            |    |                             |    |                                                |     |                                       |     |                        |     |            |
| 51  | Erlotinib + exemestane                         |                                                                                                                                                                                                                                                 |                                                                                                                                                                                                                                                                                                                                                            |    |                             |    |                                                |     |                                       |     |                        |     |            |
| 100 | Don't know                                     |                                                                                                                                                                                                                                                 |                                                                                                                                                                                                                                                                                                                                                            |    |                             |    |                                                |     |                                       |     |                        |     |            |
| 34  | posttest_fda_accelerated                       | The FDA granted accelerated approval of which of the following drug combinations for first line or initial endocrine therapy in postmenopausal women with ER+/HER2-negative advanced breast cancer?                                             | radio, Required <table border="1"> <tr> <td>63</td> <td>Everolimus + letrozole</td> </tr> <tr> <td>60</td> <td>Palbociclib + letrozole</td> </tr> <tr> <td>62</td> <td>Bevacizumab + letrozole</td> </tr> <tr> <td>61</td> <td>Erlotinib + letrozole</td> </tr> <tr> <td>100</td> <td>Don't know</td> </tr> </table>                                       | 63 | Everolimus + letrozole      | 60 | Palbociclib + letrozole                        | 62  | Bevacizumab + letrozole               | 61  | Erlotinib + letrozole  | 100 | Don't know |
| 63  | Everolimus + letrozole                         |                                                                                                                                                                                                                                                 |                                                                                                                                                                                                                                                                                                                                                            |    |                             |    |                                                |     |                                       |     |                        |     |            |
| 60  | Palbociclib + letrozole                        |                                                                                                                                                                                                                                                 |                                                                                                                                                                                                                                                                                                                                                            |    |                             |    |                                                |     |                                       |     |                        |     |            |
| 62  | Bevacizumab + letrozole                        |                                                                                                                                                                                                                                                 |                                                                                                                                                                                                                                                                                                                                                            |    |                             |    |                                                |     |                                       |     |                        |     |            |
| 61  | Erlotinib + letrozole                          |                                                                                                                                                                                                                                                 |                                                                                                                                                                                                                                                                                                                                                            |    |                             |    |                                                |     |                                       |     |                        |     |            |
| 100 | Don't know                                     |                                                                                                                                                                                                                                                 |                                                                                                                                                                                                                                                                                                                                                            |    |                             |    |                                                |     |                                       |     |                        |     |            |
| 35  | posttest_primary_mechanisms                    | Which of the following is a way primary resistance to endocrine                                                                                                                                                                                 | radio, Required <table border="1"> <tr> <td>30</td> <td>Estrogen receptor (ER)</td> </tr> </table>                                                                                                                                                                                                                                                         | 30 | Estrogen receptor (ER)      |    |                                                |     |                                       |     |                        |     |            |
| 30  | Estrogen receptor (ER)                         |                                                                                                                                                                                                                                                 |                                                                                                                                                                                                                                                                                                                                                            |    |                             |    |                                                |     |                                       |     |                        |     |            |

|     |                                          |                                                                                                                                                                                                                                                                                                                                                                                                                                                                                   |                                                                                                                                                                                                                                                                                                                                                       |    |                   |    |                                          |     |                                      |     |                                         |     |            |
|-----|------------------------------------------|-----------------------------------------------------------------------------------------------------------------------------------------------------------------------------------------------------------------------------------------------------------------------------------------------------------------------------------------------------------------------------------------------------------------------------------------------------------------------------------|-------------------------------------------------------------------------------------------------------------------------------------------------------------------------------------------------------------------------------------------------------------------------------------------------------------------------------------------------------|----|-------------------|----|------------------------------------------|-----|--------------------------------------|-----|-----------------------------------------|-----|------------|
|     |                                          | therapy in estrogen receptor-positive (ER+) breast cancer may occur?                                                                                                                                                                                                                                                                                                                                                                                                              | <table border="1"> <tr> <td></td> <td>amplification</td> </tr> <tr> <td>32</td> <td>RB1 amplification</td> </tr> <tr> <td>31</td> <td>Cyclin D1 amplification</td> </tr> <tr> <td>300</td> <td>None of the above</td> </tr> <tr> <td>100</td> <td>Don't know</td> </tr> </table>                                                                      |    | amplification     | 32 | RB1 amplification                        | 31  | Cyclin D1 amplification              | 300 | None of the above                       | 100 | Don't know |
|     | amplification                            |                                                                                                                                                                                                                                                                                                                                                                                                                                                                                   |                                                                                                                                                                                                                                                                                                                                                       |    |                   |    |                                          |     |                                      |     |                                         |     |            |
| 32  | RB1 amplification                        |                                                                                                                                                                                                                                                                                                                                                                                                                                                                                   |                                                                                                                                                                                                                                                                                                                                                       |    |                   |    |                                          |     |                                      |     |                                         |     |            |
| 31  | Cyclin D1 amplification                  |                                                                                                                                                                                                                                                                                                                                                                                                                                                                                   |                                                                                                                                                                                                                                                                                                                                                       |    |                   |    |                                          |     |                                      |     |                                         |     |            |
| 300 | None of the above                        |                                                                                                                                                                                                                                                                                                                                                                                                                                                                                   |                                                                                                                                                                                                                                                                                                                                                       |    |                   |    |                                          |     |                                      |     |                                         |     |            |
| 100 | Don't know                               |                                                                                                                                                                                                                                                                                                                                                                                                                                                                                   |                                                                                                                                                                                                                                                                                                                                                       |    |                   |    |                                          |     |                                      |     |                                         |     |            |
| 36  | posttest_estrogen                        | Estrogen is a steroid hormone that controls cell processes like cell division, growth, differentiation, and proliferation.                                                                                                                                                                                                                                                                                                                                                        | radio, Required <table border="1"> <tr> <td>1</td> <td>True</td> </tr> <tr> <td>0</td> <td>False</td> </tr> <tr> <td>100</td> <td>Don't know</td> </tr> </table>                                                                                                                                                                                      | 1  | True              | 0  | False                                    | 100 | Don't know                           |     |                                         |     |            |
| 1   | True                                     |                                                                                                                                                                                                                                                                                                                                                                                                                                                                                   |                                                                                                                                                                                                                                                                                                                                                       |    |                   |    |                                          |     |                                      |     |                                         |     |            |
| 0   | False                                    |                                                                                                                                                                                                                                                                                                                                                                                                                                                                                   |                                                                                                                                                                                                                                                                                                                                                       |    |                   |    |                                          |     |                                      |     |                                         |     |            |
| 100 | Don't know                               |                                                                                                                                                                                                                                                                                                                                                                                                                                                                                   |                                                                                                                                                                                                                                                                                                                                                       |    |                   |    |                                          |     |                                      |     |                                         |     |            |
| 37  | posttest_primary_definition              | Please fill in the blank with the correct answer. Primary resistance to endocrine therapy in ER+ breast cancer has been defined as disease progression less than ____ months after treatment in the metastatic setting.                                                                                                                                                                                                                                                           | radio, Required <table border="1"> <tr> <td>8</td> <td>8</td> </tr> <tr> <td>6</td> <td>6</td> </tr> <tr> <td>12</td> <td>12</td> </tr> <tr> <td>10</td> <td>10</td> </tr> <tr> <td>100</td> <td>Don't know</td> </tr> </table>                                                                                                                       | 8  | 8                 | 6  | 6                                        | 12  | 12                                   | 10  | 10                                      | 100 | Don't know |
| 8   | 8                                        |                                                                                                                                                                                                                                                                                                                                                                                                                                                                                   |                                                                                                                                                                                                                                                                                                                                                       |    |                   |    |                                          |     |                                      |     |                                         |     |            |
| 6   | 6                                        |                                                                                                                                                                                                                                                                                                                                                                                                                                                                                   |                                                                                                                                                                                                                                                                                                                                                       |    |                   |    |                                          |     |                                      |     |                                         |     |            |
| 12  | 12                                       |                                                                                                                                                                                                                                                                                                                                                                                                                                                                                   |                                                                                                                                                                                                                                                                                                                                                       |    |                   |    |                                          |     |                                      |     |                                         |     |            |
| 10  | 10                                       |                                                                                                                                                                                                                                                                                                                                                                                                                                                                                   |                                                                                                                                                                                                                                                                                                                                                       |    |                   |    |                                          |     |                                      |     |                                         |     |            |
| 100 | Don't know                               |                                                                                                                                                                                                                                                                                                                                                                                                                                                                                   |                                                                                                                                                                                                                                                                                                                                                       |    |                   |    |                                          |     |                                      |     |                                         |     |            |
| 38  | posttest_rb1                             | Phosphorylation of RB1 facilitates which of the following:                                                                                                                                                                                                                                                                                                                                                                                                                        | radio <table border="1"> <tr> <td>20</td> <td>Tumor suppression</td> </tr> <tr> <td>22</td> <td>Entry into the S phase of the cell cycle</td> </tr> <tr> <td>21</td> <td>Inhibition of cell cycle progression</td> </tr> <tr> <td>23</td> <td>Formation of a cyclin D1-CDK4/6 complex</td> </tr> <tr> <td>100</td> <td>Don't know</td> </tr> </table> | 20 | Tumor suppression | 22 | Entry into the S phase of the cell cycle | 21  | Inhibition of cell cycle progression | 23  | Formation of a cyclin D1-CDK4/6 complex | 100 | Don't know |
| 20  | Tumor suppression                        |                                                                                                                                                                                                                                                                                                                                                                                                                                                                                   |                                                                                                                                                                                                                                                                                                                                                       |    |                   |    |                                          |     |                                      |     |                                         |     |            |
| 22  | Entry into the S phase of the cell cycle |                                                                                                                                                                                                                                                                                                                                                                                                                                                                                   |                                                                                                                                                                                                                                                                                                                                                       |    |                   |    |                                          |     |                                      |     |                                         |     |            |
| 21  | Inhibition of cell cycle progression     |                                                                                                                                                                                                                                                                                                                                                                                                                                                                                   |                                                                                                                                                                                                                                                                                                                                                       |    |                   |    |                                          |     |                                      |     |                                         |     |            |
| 23  | Formation of a cyclin D1-CDK4/6 complex  |                                                                                                                                                                                                                                                                                                                                                                                                                                                                                   |                                                                                                                                                                                                                                                                                                                                                       |    |                   |    |                                          |     |                                      |     |                                         |     |            |
| 100 | Don't know                               |                                                                                                                                                                                                                                                                                                                                                                                                                                                                                   |                                                                                                                                                                                                                                                                                                                                                       |    |                   |    |                                          |     |                                      |     |                                         |     |            |
| 39  | submit_posttest                          | <p>Fourteen days after you click the submit survey button below you will receive an email with a link to a 5-minute follow-up survey. Upon completion, you will receive your \$100 Amazon.com Gift Card.*</p> <p>On the next screen, we will ask you for feedback on the learning materials.</p> <p>*Amazon.com is not a sponsor of this promotion. Except as required by law, Amazon.com Gift Cards ("GCs") cannot be transferred for value or redeemed for cash. GCs may be</p> | descriptive                                                                                                                                                                                                                                                                                                                                           |    |                   |    |                                          |     |                                      |     |                                         |     |            |



|                                    |                                              |                                                                                                                                                                                                                                                                                                                                                                                      |                                                                                                                                                                                                                                                                        |   |                   |   |            |   |                           |   |       |   |                |
|------------------------------------|----------------------------------------------|--------------------------------------------------------------------------------------------------------------------------------------------------------------------------------------------------------------------------------------------------------------------------------------------------------------------------------------------------------------------------------------|------------------------------------------------------------------------------------------------------------------------------------------------------------------------------------------------------------------------------------------------------------------------|---|-------------------|---|------------|---|---------------------------|---|-------|---|----------------|
|                                    |                                              | used only for purchases of eligible goods at Amazon.com or certain of its affiliated websites. For complete terms and conditions, see <a href="http://www.amazon.com/gc-legal">www.amazon.com/gc-legal</a> . GCs are issued by ACI Gift Cards, Inc., a Washington corporation. All Amazon ®, ™ & © are IP of Amazon.com, Inc. or its affiliates. No expiration date or service fees. |                                                                                                                                                                                                                                                                        |   |                   |   |            |   |                           |   |       |   |                |
| 40                                 | postlearning_material_review_survey_complete | Complete?                                                                                                                                                                                                                                                                                                                                                                            | dropdown <table border="1"> <tr> <td>0</td> <td>Incomplete</td> </tr> <tr> <td>1</td> <td>Unverified</td> </tr> <tr> <td>2</td> <td>Complete</td> </tr> </table>                                                                                                       | 0 | Incomplete        | 1 | Unverified | 2 | Complete                  |   |       |   |                |
| 0                                  | Incomplete                                   |                                                                                                                                                                                                                                                                                                                                                                                      |                                                                                                                                                                                                                                                                        |   |                   |   |            |   |                           |   |       |   |                |
| 1                                  | Unverified                                   |                                                                                                                                                                                                                                                                                                                                                                                      |                                                                                                                                                                                                                                                                        |   |                   |   |            |   |                           |   |       |   |                |
| 2                                  | Complete                                     |                                                                                                                                                                                                                                                                                                                                                                                      |                                                                                                                                                                                                                                                                        |   |                   |   |            |   |                           |   |       |   |                |
| Instrument: <b>Feedback Survey</b> |                                              |                                                                                                                                                                                                                                                                                                                                                                                      |                                                                                                                                                                                                                                                                        |   |                   |   |            |   |                           |   |       |   |                |
| 41                                 | easy_understanding                           | The information I viewed was easy to understand.                                                                                                                                                                                                                                                                                                                                     | radio <table border="1"> <tr> <td>1</td> <td>Strongly disagree</td> </tr> <tr> <td>2</td> <td>Disagree</td> </tr> <tr> <td>3</td> <td>Neither agree or disagree</td> </tr> <tr> <td>4</td> <td>Agree</td> </tr> <tr> <td>5</td> <td>Strongly agree</td> </tr> </table> | 1 | Strongly disagree | 2 | Disagree   | 3 | Neither agree or disagree | 4 | Agree | 5 | Strongly agree |
| 1                                  | Strongly disagree                            |                                                                                                                                                                                                                                                                                                                                                                                      |                                                                                                                                                                                                                                                                        |   |                   |   |            |   |                           |   |       |   |                |
| 2                                  | Disagree                                     |                                                                                                                                                                                                                                                                                                                                                                                      |                                                                                                                                                                                                                                                                        |   |                   |   |            |   |                           |   |       |   |                |
| 3                                  | Neither agree or disagree                    |                                                                                                                                                                                                                                                                                                                                                                                      |                                                                                                                                                                                                                                                                        |   |                   |   |            |   |                           |   |       |   |                |
| 4                                  | Agree                                        |                                                                                                                                                                                                                                                                                                                                                                                      |                                                                                                                                                                                                                                                                        |   |                   |   |            |   |                           |   |       |   |                |
| 5                                  | Strongly agree                               |                                                                                                                                                                                                                                                                                                                                                                                      |                                                                                                                                                                                                                                                                        |   |                   |   |            |   |                           |   |       |   |                |
| 42                                 | information_confusing                        | Some of the information I viewed was confusing.                                                                                                                                                                                                                                                                                                                                      | radio <table border="1"> <tr> <td>1</td> <td>Strongly disagree</td> </tr> <tr> <td>2</td> <td>Disagree</td> </tr> <tr> <td>3</td> <td>Neither agree or disagree</td> </tr> <tr> <td>4</td> <td>Agree</td> </tr> <tr> <td>5</td> <td>Strongly agree</td> </tr> </table> | 1 | Strongly disagree | 2 | Disagree   | 3 | Neither agree or disagree | 4 | Agree | 5 | Strongly agree |
| 1                                  | Strongly disagree                            |                                                                                                                                                                                                                                                                                                                                                                                      |                                                                                                                                                                                                                                                                        |   |                   |   |            |   |                           |   |       |   |                |
| 2                                  | Disagree                                     |                                                                                                                                                                                                                                                                                                                                                                                      |                                                                                                                                                                                                                                                                        |   |                   |   |            |   |                           |   |       |   |                |
| 3                                  | Neither agree or disagree                    |                                                                                                                                                                                                                                                                                                                                                                                      |                                                                                                                                                                                                                                                                        |   |                   |   |            |   |                           |   |       |   |                |
| 4                                  | Agree                                        |                                                                                                                                                                                                                                                                                                                                                                                      |                                                                                                                                                                                                                                                                        |   |                   |   |            |   |                           |   |       |   |                |
| 5                                  | Strongly agree                               |                                                                                                                                                                                                                                                                                                                                                                                      |                                                                                                                                                                                                                                                                        |   |                   |   |            |   |                           |   |       |   |                |
| 43                                 | information_satisfaction                     | I am satisfied with the information I viewed.                                                                                                                                                                                                                                                                                                                                        | radio <table border="1"> <tr> <td>1</td> <td>Strongly disagree</td> </tr> <tr> <td>2</td> <td>Disagree</td> </tr> <tr> <td>3</td> <td>Neither agree or disagree</td> </tr> <tr> <td>4</td> <td>Agree</td> </tr> <tr> <td>5</td> <td>Strongly agree</td> </tr> </table> | 1 | Strongly disagree | 2 | Disagree   | 3 | Neither agree or disagree | 4 | Agree | 5 | Strongly agree |
| 1                                  | Strongly disagree                            |                                                                                                                                                                                                                                                                                                                                                                                      |                                                                                                                                                                                                                                                                        |   |                   |   |            |   |                           |   |       |   |                |
| 2                                  | Disagree                                     |                                                                                                                                                                                                                                                                                                                                                                                      |                                                                                                                                                                                                                                                                        |   |                   |   |            |   |                           |   |       |   |                |
| 3                                  | Neither agree or disagree                    |                                                                                                                                                                                                                                                                                                                                                                                      |                                                                                                                                                                                                                                                                        |   |                   |   |            |   |                           |   |       |   |                |
| 4                                  | Agree                                        |                                                                                                                                                                                                                                                                                                                                                                                      |                                                                                                                                                                                                                                                                        |   |                   |   |            |   |                           |   |       |   |                |
| 5                                  | Strongly agree                               |                                                                                                                                                                                                                                                                                                                                                                                      |                                                                                                                                                                                                                                                                        |   |                   |   |            |   |                           |   |       |   |                |
| 44                                 | information_new                              | The information I viewed taught me something new.                                                                                                                                                                                                                                                                                                                                    | radio <table border="1"> <tr> <td>1</td> <td>Strongly disagree</td> </tr> <tr> <td>2</td> <td>Disagree</td> </tr> </table>                                                                                                                                             | 1 | Strongly disagree | 2 | Disagree   |   |                           |   |       |   |                |
| 1                                  | Strongly disagree                            |                                                                                                                                                                                                                                                                                                                                                                                      |                                                                                                                                                                                                                                                                        |   |                   |   |            |   |                           |   |       |   |                |
| 2                                  | Disagree                                     |                                                                                                                                                                                                                                                                                                                                                                                      |                                                                                                                                                                                                                                                                        |   |                   |   |            |   |                           |   |       |   |                |

|                                             |                                          |                                                                                                                     |                                                                                                                                                                                                                                                                                                                                                                 |    |                                          |    |                                      |    |                                         |    |                         |     |            |
|---------------------------------------------|------------------------------------------|---------------------------------------------------------------------------------------------------------------------|-----------------------------------------------------------------------------------------------------------------------------------------------------------------------------------------------------------------------------------------------------------------------------------------------------------------------------------------------------------------|----|------------------------------------------|----|--------------------------------------|----|-----------------------------------------|----|-------------------------|-----|------------|
|                                             |                                          |                                                                                                                     | <table border="1"> <tr> <td>3</td> <td>Neither agree or disagree</td> </tr> <tr> <td>4</td> <td>Agree</td> </tr> <tr> <td>5</td> <td>Strongly agree</td> </tr> </table>                                                                                                                                                                                         | 3  | Neither agree or disagree                | 4  | Agree                                | 5  | Strongly agree                          |    |                         |     |            |
| 3                                           | Neither agree or disagree                |                                                                                                                     |                                                                                                                                                                                                                                                                                                                                                                 |    |                                          |    |                                      |    |                                         |    |                         |     |            |
| 4                                           | Agree                                    |                                                                                                                     |                                                                                                                                                                                                                                                                                                                                                                 |    |                                          |    |                                      |    |                                         |    |                         |     |            |
| 5                                           | Strongly agree                           |                                                                                                                     |                                                                                                                                                                                                                                                                                                                                                                 |    |                                          |    |                                      |    |                                         |    |                         |     |            |
| 45                                          | information_openended                    | Do you have any other thoughts on this material that you would like to share with us?                               | notes                                                                                                                                                                                                                                                                                                                                                           |    |                                          |    |                                      |    |                                         |    |                         |     |            |
| 46                                          | feedback_survey_complete                 | Complete?                                                                                                           | dropdown <table border="1"> <tr> <td>0</td> <td>Incomplete</td> </tr> <tr> <td>1</td> <td>Unverified</td> </tr> <tr> <td>2</td> <td>Complete</td> </tr> </table>                                                                                                                                                                                                | 0  | Incomplete                               | 1  | Unverified                           | 2  | Complete                                |    |                         |     |            |
| 0                                           | Incomplete                               |                                                                                                                     |                                                                                                                                                                                                                                                                                                                                                                 |    |                                          |    |                                      |    |                                         |    |                         |     |            |
| 1                                           | Unverified                               |                                                                                                                     |                                                                                                                                                                                                                                                                                                                                                                 |    |                                          |    |                                      |    |                                         |    |                         |     |            |
| 2                                           | Complete                                 |                                                                                                                     |                                                                                                                                                                                                                                                                                                                                                                 |    |                                          |    |                                      |    |                                         |    |                         |     |            |
| <b>Instrument: Knowledge Follow-up Test</b> |                                          |                                                                                                                     |                                                                                                                                                                                                                                                                                                                                                                 |    |                                          |    |                                      |    |                                         |    |                         |     |            |
| 47                                          | followup_fda_approved                    | Which drug combination is FDA-approved to treat ER+ metastatic breast cancer resistant to letrozole or anastrozole? | radio, Required <table border="1"> <tr> <td>51</td> <td>Erlotinib + exemestane</td> </tr> <tr> <td>52</td> <td>Palbociclib + exemestane</td> </tr> <tr> <td>53</td> <td>Bevacizumab + exemestane</td> </tr> <tr> <td>50</td> <td>Everolimus + exemestane</td> </tr> <tr> <td>100</td> <td>Don't know</td> </tr> </table>                                        | 51 | Erlotinib + exemestane                   | 52 | Palbociclib + exemestane             | 53 | Bevacizumab + exemestane                | 50 | Everolimus + exemestane | 100 | Don't know |
| 51                                          | Erlotinib + exemestane                   |                                                                                                                     |                                                                                                                                                                                                                                                                                                                                                                 |    |                                          |    |                                      |    |                                         |    |                         |     |            |
| 52                                          | Palbociclib + exemestane                 |                                                                                                                     |                                                                                                                                                                                                                                                                                                                                                                 |    |                                          |    |                                      |    |                                         |    |                         |     |            |
| 53                                          | Bevacizumab + exemestane                 |                                                                                                                     |                                                                                                                                                                                                                                                                                                                                                                 |    |                                          |    |                                      |    |                                         |    |                         |     |            |
| 50                                          | Everolimus + exemestane                  |                                                                                                                     |                                                                                                                                                                                                                                                                                                                                                                 |    |                                          |    |                                      |    |                                         |    |                         |     |            |
| 100                                         | Don't know                               |                                                                                                                     |                                                                                                                                                                                                                                                                                                                                                                 |    |                                          |    |                                      |    |                                         |    |                         |     |            |
| 48                                          | followup_rb1                             | Phosphorylation of RB1 facilitates which of the following:                                                          | radio, Required <table border="1"> <tr> <td>22</td> <td>Entry into the S phase of the cell cycle</td> </tr> <tr> <td>21</td> <td>Inhibition of cell cycle progression</td> </tr> <tr> <td>23</td> <td>Formation of a Cyclin D1-CDK4/6 complex</td> </tr> <tr> <td>20</td> <td>Tumor suppression</td> </tr> <tr> <td>100</td> <td>Don't know</td> </tr> </table> | 22 | Entry into the S phase of the cell cycle | 21 | Inhibition of cell cycle progression | 23 | Formation of a Cyclin D1-CDK4/6 complex | 20 | Tumor suppression       | 100 | Don't know |
| 22                                          | Entry into the S phase of the cell cycle |                                                                                                                     |                                                                                                                                                                                                                                                                                                                                                                 |    |                                          |    |                                      |    |                                         |    |                         |     |            |
| 21                                          | Inhibition of cell cycle progression     |                                                                                                                     |                                                                                                                                                                                                                                                                                                                                                                 |    |                                          |    |                                      |    |                                         |    |                         |     |            |
| 23                                          | Formation of a Cyclin D1-CDK4/6 complex  |                                                                                                                     |                                                                                                                                                                                                                                                                                                                                                                 |    |                                          |    |                                      |    |                                         |    |                         |     |            |
| 20                                          | Tumor suppression                        |                                                                                                                     |                                                                                                                                                                                                                                                                                                                                                                 |    |                                          |    |                                      |    |                                         |    |                         |     |            |
| 100                                         | Don't know                               |                                                                                                                     |                                                                                                                                                                                                                                                                                                                                                                 |    |                                          |    |                                      |    |                                         |    |                         |     |            |
| 49                                          | followup_palbociclib                     | Palbociclib is in which of the following drug classes?                                                              | radio, Required <table border="1"> <tr> <td>71</td> <td>CDK4/6 inhibitors</td> </tr> <tr> <td>73</td> <td>EGFR inhibitors</td> </tr> <tr> <td>70</td> <td>mTOR inhibitors</td> </tr> <tr> <td>72</td> <td>PI3K inhibitors</td> </tr> <tr> <td>100</td> <td>Don't know</td> </tr> </table>                                                                       | 71 | CDK4/6 inhibitors                        | 73 | EGFR inhibitors                      | 70 | mTOR inhibitors                         | 72 | PI3K inhibitors         | 100 | Don't know |
| 71                                          | CDK4/6 inhibitors                        |                                                                                                                     |                                                                                                                                                                                                                                                                                                                                                                 |    |                                          |    |                                      |    |                                         |    |                         |     |            |
| 73                                          | EGFR inhibitors                          |                                                                                                                     |                                                                                                                                                                                                                                                                                                                                                                 |    |                                          |    |                                      |    |                                         |    |                         |     |            |
| 70                                          | mTOR inhibitors                          |                                                                                                                     |                                                                                                                                                                                                                                                                                                                                                                 |    |                                          |    |                                      |    |                                         |    |                         |     |            |
| 72                                          | PI3K inhibitors                          |                                                                                                                     |                                                                                                                                                                                                                                                                                                                                                                 |    |                                          |    |                                      |    |                                         |    |                         |     |            |
| 100                                         | Don't know                               |                                                                                                                     |                                                                                                                                                                                                                                                                                                                                                                 |    |                                          |    |                                      |    |                                         |    |                         |     |            |
| 50                                          | followup_acquired_mechanisms             | Which of the following are ways acquired resistance to endocrine therapy in ER+ breast may occur?                   | radio, Required <table border="1"> <tr> <td>41</td> <td>Changes in the tumor microenvironment</td> </tr> <tr> <td>42</td> <td>Estrogen receptor mutations</td> </tr> </table>                                                                                                                                                                                   | 41 | Changes in the tumor microenvironment    | 42 | Estrogen receptor mutations          |    |                                         |    |                         |     |            |
| 41                                          | Changes in the tumor microenvironment    |                                                                                                                     |                                                                                                                                                                                                                                                                                                                                                                 |    |                                          |    |                                      |    |                                         |    |                         |     |            |
| 42                                          | Estrogen receptor mutations              |                                                                                                                     |                                                                                                                                                                                                                                                                                                                                                                 |    |                                          |    |                                      |    |                                         |    |                         |     |            |

|     |                                                |                                                                                                                                                                                                                         |                                                                                                                                                                                                                                                                                                                           |    |                                                |     |                                      |     |                         |     |                         |     |            |
|-----|------------------------------------------------|-------------------------------------------------------------------------------------------------------------------------------------------------------------------------------------------------------------------------|---------------------------------------------------------------------------------------------------------------------------------------------------------------------------------------------------------------------------------------------------------------------------------------------------------------------------|----|------------------------------------------------|-----|--------------------------------------|-----|-------------------------|-----|-------------------------|-----|------------|
|     |                                                |                                                                                                                                                                                                                         | <table border="1"> <tr> <td>40</td> <td>Activation of growth factor signaling pathways</td> </tr> <tr> <td>200</td> <td>All of the above</td> </tr> <tr> <td>100</td> <td>Don't know</td> </tr> </table>                                                                                                                  | 40 | Activation of growth factor signaling pathways | 200 | All of the above                     | 100 | Don't know              |     |                         |     |            |
| 40  | Activation of growth factor signaling pathways |                                                                                                                                                                                                                         |                                                                                                                                                                                                                                                                                                                           |    |                                                |     |                                      |     |                         |     |                         |     |            |
| 200 | All of the above                               |                                                                                                                                                                                                                         |                                                                                                                                                                                                                                                                                                                           |    |                                                |     |                                      |     |                         |     |                         |     |            |
| 100 | Don't know                                     |                                                                                                                                                                                                                         |                                                                                                                                                                                                                                                                                                                           |    |                                                |     |                                      |     |                         |     |                         |     |            |
| 51  | followup_estrogen                              | Estrogen is a steroid hormone that controls cell processes like cell division, growth, differentiation, and proliferation.                                                                                              | radio, Required <table border="1"> <tr> <td>1</td> <td>True</td> </tr> <tr> <td>0</td> <td>False</td> </tr> <tr> <td>100</td> <td>Don't know</td> </tr> </table>                                                                                                                                                          | 1  | True                                           | 0   | False                                | 100 | Don't know              |     |                         |     |            |
| 1   | True                                           |                                                                                                                                                                                                                         |                                                                                                                                                                                                                                                                                                                           |    |                                                |     |                                      |     |                         |     |                         |     |            |
| 0   | False                                          |                                                                                                                                                                                                                         |                                                                                                                                                                                                                                                                                                                           |    |                                                |     |                                      |     |                         |     |                         |     |            |
| 100 | Don't know                                     |                                                                                                                                                                                                                         |                                                                                                                                                                                                                                                                                                                           |    |                                                |     |                                      |     |                         |     |                         |     |            |
| 52  | followup_fda_accelerated                       | The FDA granted accelerated approval of which of the following drug combinations for first line or initial endocrine therapy in postmenopausal women with ER+/HER2-negative advanced breast cancer?                     | radio, Required <table border="1"> <tr> <td>63</td> <td>Everolimus + letrozole</td> </tr> <tr> <td>62</td> <td>Bevacizumab + letrozole</td> </tr> <tr> <td>61</td> <td>Erlotinib + letrozole</td> </tr> <tr> <td>60</td> <td>Palbociclib + letrozole</td> </tr> <tr> <td>100</td> <td>Don't know</td> </tr> </table>      | 63 | Everolimus + letrozole                         | 62  | Bevacizumab + letrozole              | 61  | Erlotinib + letrozole   | 60  | Palbociclib + letrozole | 100 | Don't know |
| 63  | Everolimus + letrozole                         |                                                                                                                                                                                                                         |                                                                                                                                                                                                                                                                                                                           |    |                                                |     |                                      |     |                         |     |                         |     |            |
| 62  | Bevacizumab + letrozole                        |                                                                                                                                                                                                                         |                                                                                                                                                                                                                                                                                                                           |    |                                                |     |                                      |     |                         |     |                         |     |            |
| 61  | Erlotinib + letrozole                          |                                                                                                                                                                                                                         |                                                                                                                                                                                                                                                                                                                           |    |                                                |     |                                      |     |                         |     |                         |     |            |
| 60  | Palbociclib + letrozole                        |                                                                                                                                                                                                                         |                                                                                                                                                                                                                                                                                                                           |    |                                                |     |                                      |     |                         |     |                         |     |            |
| 100 | Don't know                                     |                                                                                                                                                                                                                         |                                                                                                                                                                                                                                                                                                                           |    |                                                |     |                                      |     |                         |     |                         |     |            |
| 53  | followup_primary_definition                    | Please fill in the blank with the correct answer. Primary resistance to endocrine therapy in ER+ breast cancer has been defined as disease progression less than ____ months after treatment in the metastatic setting. | radio, Required <table border="1"> <tr> <td>10</td> <td>10</td> </tr> <tr> <td>8</td> <td>8</td> </tr> <tr> <td>6</td> <td>6</td> </tr> <tr> <td>12</td> <td>12</td> </tr> <tr> <td>100</td> <td>Don't know</td> </tr> </table>                                                                                           | 10 | 10                                             | 8   | 8                                    | 6   | 6                       | 12  | 12                      | 100 | Don't know |
| 10  | 10                                             |                                                                                                                                                                                                                         |                                                                                                                                                                                                                                                                                                                           |    |                                                |     |                                      |     |                         |     |                         |     |            |
| 8   | 8                                              |                                                                                                                                                                                                                         |                                                                                                                                                                                                                                                                                                                           |    |                                                |     |                                      |     |                         |     |                         |     |            |
| 6   | 6                                              |                                                                                                                                                                                                                         |                                                                                                                                                                                                                                                                                                                           |    |                                                |     |                                      |     |                         |     |                         |     |            |
| 12  | 12                                             |                                                                                                                                                                                                                         |                                                                                                                                                                                                                                                                                                                           |    |                                                |     |                                      |     |                         |     |                         |     |            |
| 100 | Don't know                                     |                                                                                                                                                                                                                         |                                                                                                                                                                                                                                                                                                                           |    |                                                |     |                                      |     |                         |     |                         |     |            |
| 54  | followup_primary_mechanisms                    | Which of the following is a way primary resistance to endocrine therapy in estrogen receptor-positive (ER+) breast cancer may occur?                                                                                    | radio, Required <table border="1"> <tr> <td>32</td> <td>RB1 amplification</td> </tr> <tr> <td>30</td> <td>Estrogen receptor (ER) amplification</td> </tr> <tr> <td>31</td> <td>Cyclin D1 amplification</td> </tr> <tr> <td>300</td> <td>None of the above</td> </tr> <tr> <td>100</td> <td>Don't know</td> </tr> </table> | 32 | RB1 amplification                              | 30  | Estrogen receptor (ER) amplification | 31  | Cyclin D1 amplification | 300 | None of the above       | 100 | Don't know |
| 32  | RB1 amplification                              |                                                                                                                                                                                                                         |                                                                                                                                                                                                                                                                                                                           |    |                                                |     |                                      |     |                         |     |                         |     |            |
| 30  | Estrogen receptor (ER) amplification           |                                                                                                                                                                                                                         |                                                                                                                                                                                                                                                                                                                           |    |                                                |     |                                      |     |                         |     |                         |     |            |
| 31  | Cyclin D1 amplification                        |                                                                                                                                                                                                                         |                                                                                                                                                                                                                                                                                                                           |    |                                                |     |                                      |     |                         |     |                         |     |            |
| 300 | None of the above                              |                                                                                                                                                                                                                         |                                                                                                                                                                                                                                                                                                                           |    |                                                |     |                                      |     |                         |     |                         |     |            |
| 100 | Don't know                                     |                                                                                                                                                                                                                         |                                                                                                                                                                                                                                                                                                                           |    |                                                |     |                                      |     |                         |     |                         |     |            |
| 55  | followup_cdk46_settings                        | CDK4/6 inhibitors have only been evaluated in the first line setting in breast cancer.                                                                                                                                  | radio, Required <table border="1"> <tr> <td>1</td> <td>True</td> </tr> <tr> <td>0</td> <td>False</td> </tr> <tr> <td>100</td> <td>Don't know</td> </tr> </table>                                                                                                                                                          | 1  | True                                           | 0   | False                                | 100 | Don't know              |     |                         |     |            |
| 1   | True                                           |                                                                                                                                                                                                                         |                                                                                                                                                                                                                                                                                                                           |    |                                                |     |                                      |     |                         |     |                         |     |            |
| 0   | False                                          |                                                                                                                                                                                                                         |                                                                                                                                                                                                                                                                                                                           |    |                                                |     |                                      |     |                         |     |                         |     |            |
| 100 | Don't know                                     |                                                                                                                                                                                                                         |                                                                                                                                                                                                                                                                                                                           |    |                                                |     |                                      |     |                         |     |                         |     |            |
| 56  | followup_acquired_definition                   | Acquired resistance to endocrine therapy in ER+ breast cancer is defined as recurrence at least 6-12 months after completion of adjuvant therapy or disease progression > 6 months after                                | radio, Required <table border="1"> <tr> <td>1</td> <td>True</td> </tr> <tr> <td>0</td> <td>False</td> </tr> <tr> <td>100</td> <td>Don't know</td> </tr> </table>                                                                                                                                                          | 1  | True                                           | 0   | False                                | 100 | Don't know              |     |                         |     |            |
| 1   | True                                           |                                                                                                                                                                                                                         |                                                                                                                                                                                                                                                                                                                           |    |                                                |     |                                      |     |                         |     |                         |     |            |
| 0   | False                                          |                                                                                                                                                                                                                         |                                                                                                                                                                                                                                                                                                                           |    |                                                |     |                                      |     |                         |     |                         |     |            |
| 100 | Don't know                                     |                                                                                                                                                                                                                         |                                                                                                                                                                                                                                                                                                                           |    |                                                |     |                                      |     |                         |     |                         |     |            |

|                                        |                                                                        |                                                                              |                                                                                                                                                                                                                                                                      |   |                    |       |              |              |                           |   |              |                                  |
|----------------------------------------|------------------------------------------------------------------------|------------------------------------------------------------------------------|----------------------------------------------------------------------------------------------------------------------------------------------------------------------------------------------------------------------------------------------------------------------|---|--------------------|-------|--------------|--------------|---------------------------|---|--------------|----------------------------------|
|                                        |                                                                        | endocrine therapy initiated in the metastatic setting.                       |                                                                                                                                                                                                                                                                      |   |                    |       |              |              |                           |   |              |                                  |
| 57                                     | followup_survey_complete                                               | Complete?                                                                    | dropdown <table border="1"> <tr> <td>0</td> <td>Incomplete</td> </tr> <tr> <td>1</td> <td>Unverified</td> </tr> <tr> <td>2</td> <td>Complete</td> </tr> </table>                                                                                                     | 0 | Incomplete         | 1     | Unverified   | 2            | Complete                  |   |              |                                  |
| 0                                      | Incomplete                                                             |                                                                              |                                                                                                                                                                                                                                                                      |   |                    |       |              |              |                           |   |              |                                  |
| 1                                      | Unverified                                                             |                                                                              |                                                                                                                                                                                                                                                                      |   |                    |       |              |              |                           |   |              |                                  |
| 2                                      | Complete                                                               |                                                                              |                                                                                                                                                                                                                                                                      |   |                    |       |              |              |                           |   |              |                                  |
| Instrument: <b>Demographics Survey</b> |                                                                        |                                                                              |                                                                                                                                                                                                                                                                      |   |                    |       |              |              |                           |   |              |                                  |
| 58                                     | practice_type                                                          | What is your practice type?                                                  | radio <table border="1"> <tr> <td>1</td> <td>Academic</td> </tr> <tr> <td>3</td> <td>Community</td> </tr> <tr> <td>4</td> <td>Both</td> </tr> <tr> <td>5</td> <td>Other</td> </tr> </table>                                                                          | 1 | Academic           | 3     | Community    | 4            | Both                      | 5 | Other        |                                  |
| 1                                      | Academic                                                               |                                                                              |                                                                                                                                                                                                                                                                      |   |                    |       |              |              |                           |   |              |                                  |
| 3                                      | Community                                                              |                                                                              |                                                                                                                                                                                                                                                                      |   |                    |       |              |              |                           |   |              |                                  |
| 4                                      | Both                                                                   |                                                                              |                                                                                                                                                                                                                                                                      |   |                    |       |              |              |                           |   |              |                                  |
| 5                                      | Other                                                                  |                                                                              |                                                                                                                                                                                                                                                                      |   |                    |       |              |              |                           |   |              |                                  |
| 59                                     | other_practicetype<br>Show the field ONLY if:<br>[practice_type] = '5' | Other                                                                        | text                                                                                                                                                                                                                                                                 |   |                    |       |              |              |                           |   |              |                                  |
| 60                                     | percentage_breastpatients                                              | What is the percentage of patients seen with breast cancer in your practice? | radio <table border="1"> <tr> <td>1</td> <td>Less than 25%</td> </tr> <tr> <td>2</td> <td>25%-50%</td> </tr> <tr> <td>3</td> <td>Greater than 50%</td> </tr> <tr> <td>4</td> <td>Unknown</td> </tr> </table>                                                         | 1 | Less than 25%      | 2     | 25%-50%      | 3            | Greater than 50%          | 4 | Unknown      |                                  |
| 1                                      | Less than 25%                                                          |                                                                              |                                                                                                                                                                                                                                                                      |   |                    |       |              |              |                           |   |              |                                  |
| 2                                      | 25%-50%                                                                |                                                                              |                                                                                                                                                                                                                                                                      |   |                    |       |              |              |                           |   |              |                                  |
| 3                                      | Greater than 50%                                                       |                                                                              |                                                                                                                                                                                                                                                                      |   |                    |       |              |              |                           |   |              |                                  |
| 4                                      | Unknown                                                                |                                                                              |                                                                                                                                                                                                                                                                      |   |                    |       |              |              |                           |   |              |                                  |
| 61                                     | age_years                                                              | What is your age (years)?                                                    | text (integer, Min: 18, Max: 120)                                                                                                                                                                                                                                    |   |                    |       |              |              |                           |   |              |                                  |
| 62                                     | gender                                                                 | What is your gender?                                                         | radio <table border="1"> <tr> <td>1</td> <td>Male</td> </tr> <tr> <td>2</td> <td>Female</td> </tr> <tr> <td>3</td> <td>Prefer not to say</td> </tr> </table>                                                                                                         | 1 | Male               | 2     | Female       | 3            | Prefer not to say         |   |              |                                  |
| 1                                      | Male                                                                   |                                                                              |                                                                                                                                                                                                                                                                      |   |                    |       |              |              |                           |   |              |                                  |
| 2                                      | Female                                                                 |                                                                              |                                                                                                                                                                                                                                                                      |   |                    |       |              |              |                           |   |              |                                  |
| 3                                      | Prefer not to say                                                      |                                                                              |                                                                                                                                                                                                                                                                      |   |                    |       |              |              |                           |   |              |                                  |
| 63                                     | ethnicity                                                              | Ethnicity:                                                                   | radio <table border="1"> <tr> <td>1</td> <td>Hispanic or Latino</td> </tr> <tr> <td>2</td> <td>Non-Hispanic</td> </tr> <tr> <td>3</td> <td>Prefer not to say</td> </tr> </table>                                                                                     | 1 | Hispanic or Latino | 2     | Non-Hispanic | 3            | Prefer not to say         |   |              |                                  |
| 1                                      | Hispanic or Latino                                                     |                                                                              |                                                                                                                                                                                                                                                                      |   |                    |       |              |              |                           |   |              |                                  |
| 2                                      | Non-Hispanic                                                           |                                                                              |                                                                                                                                                                                                                                                                      |   |                    |       |              |              |                           |   |              |                                  |
| 3                                      | Prefer not to say                                                      |                                                                              |                                                                                                                                                                                                                                                                      |   |                    |       |              |              |                           |   |              |                                  |
| 64                                     | race                                                                   | Race:<br><i>Check all that apply.</i>                                        | checkbox <table border="1"> <tr> <td>1</td> <td>ethnicity__1</td> <td>White</td> </tr> <tr> <td>3</td> <td>ethnicity__3</td> <td>Black or African American</td> </tr> <tr> <td>4</td> <td>ethnicity__4</td> <td>Native Hawaiian or Other Pacific</td> </tr> </table> | 1 | ethnicity__1       | White | 3            | ethnicity__3 | Black or African American | 4 | ethnicity__4 | Native Hawaiian or Other Pacific |
| 1                                      | ethnicity__1                                                           | White                                                                        |                                                                                                                                                                                                                                                                      |   |                    |       |              |              |                           |   |              |                                  |
| 3                                      | ethnicity__3                                                           | Black or African American                                                    |                                                                                                                                                                                                                                                                      |   |                    |       |              |              |                           |   |              |                                  |
| 4                                      | ethnicity__4                                                           | Native Hawaiian or Other Pacific                                             |                                                                                                                                                                                                                                                                      |   |                    |       |              |              |                           |   |              |                                  |

|                                            |                                                                          |                                                                                                                                                                                                                                                            |                                                                                                                                                                                                                                                                                                                                                                                                                                    |   |            |          |            |              |          |   |              |                                  |    |               |       |    |               |         |    |               |                   |
|--------------------------------------------|--------------------------------------------------------------------------|------------------------------------------------------------------------------------------------------------------------------------------------------------------------------------------------------------------------------------------------------------|------------------------------------------------------------------------------------------------------------------------------------------------------------------------------------------------------------------------------------------------------------------------------------------------------------------------------------------------------------------------------------------------------------------------------------|---|------------|----------|------------|--------------|----------|---|--------------|----------------------------------|----|---------------|-------|----|---------------|---------|----|---------------|-------------------|
|                                            |                                                                          |                                                                                                                                                                                                                                                            | <table border="1"> <tr> <td></td> <td></td> <td>Islander</td> </tr> <tr> <td>5</td> <td>ethnicity__5</td> <td>Asian</td> </tr> <tr> <td>6</td> <td>ethnicity__6</td> <td>American Indian or Alaska Native</td> </tr> <tr> <td>97</td> <td>ethnicity__97</td> <td>Other</td> </tr> <tr> <td>99</td> <td>ethnicity__99</td> <td>Unknown</td> </tr> <tr> <td>98</td> <td>ethnicity__98</td> <td>Prefer not to say</td> </tr> </table> |   |            | Islander | 5          | ethnicity__5 | Asian    | 6 | ethnicity__6 | American Indian or Alaska Native | 97 | ethnicity__97 | Other | 99 | ethnicity__99 | Unknown | 98 | ethnicity__98 | Prefer not to say |
|                                            |                                                                          | Islander                                                                                                                                                                                                                                                   |                                                                                                                                                                                                                                                                                                                                                                                                                                    |   |            |          |            |              |          |   |              |                                  |    |               |       |    |               |         |    |               |                   |
| 5                                          | ethnicity__5                                                             | Asian                                                                                                                                                                                                                                                      |                                                                                                                                                                                                                                                                                                                                                                                                                                    |   |            |          |            |              |          |   |              |                                  |    |               |       |    |               |         |    |               |                   |
| 6                                          | ethnicity__6                                                             | American Indian or Alaska Native                                                                                                                                                                                                                           |                                                                                                                                                                                                                                                                                                                                                                                                                                    |   |            |          |            |              |          |   |              |                                  |    |               |       |    |               |         |    |               |                   |
| 97                                         | ethnicity__97                                                            | Other                                                                                                                                                                                                                                                      |                                                                                                                                                                                                                                                                                                                                                                                                                                    |   |            |          |            |              |          |   |              |                                  |    |               |       |    |               |         |    |               |                   |
| 99                                         | ethnicity__99                                                            | Unknown                                                                                                                                                                                                                                                    |                                                                                                                                                                                                                                                                                                                                                                                                                                    |   |            |          |            |              |          |   |              |                                  |    |               |       |    |               |         |    |               |                   |
| 98                                         | ethnicity__98                                                            | Prefer not to say                                                                                                                                                                                                                                          |                                                                                                                                                                                                                                                                                                                                                                                                                                    |   |            |          |            |              |          |   |              |                                  |    |               |       |    |               |         |    |               |                   |
| 65                                         | demographics_survey_complete                                             | Complete?                                                                                                                                                                                                                                                  | dropdown <table border="1"> <tr> <td>0</td> <td>Incomplete</td> </tr> <tr> <td>1</td> <td>Unverified</td> </tr> <tr> <td>2</td> <td>Complete</td> </tr> </table>                                                                                                                                                                                                                                                                   | 0 | Incomplete | 1        | Unverified | 2            | Complete |   |              |                                  |    |               |       |    |               |         |    |               |                   |
| 0                                          | Incomplete                                                               |                                                                                                                                                                                                                                                            |                                                                                                                                                                                                                                                                                                                                                                                                                                    |   |            |          |            |              |          |   |              |                                  |    |               |       |    |               |         |    |               |                   |
| 1                                          | Unverified                                                               |                                                                                                                                                                                                                                                            |                                                                                                                                                                                                                                                                                                                                                                                                                                    |   |            |          |            |              |          |   |              |                                  |    |               |       |    |               |         |    |               |                   |
| 2                                          | Complete                                                                 |                                                                                                                                                                                                                                                            |                                                                                                                                                                                                                                                                                                                                                                                                                                    |   |            |          |            |              |          |   |              |                                  |    |               |       |    |               |         |    |               |                   |
| <b>Instrument: Amazon Gift Card Survey</b> |                                                                          |                                                                                                                                                                                                                                                            |                                                                                                                                                                                                                                                                                                                                                                                                                                    |   |            |          |            |              |          |   |              |                                  |    |               |       |    |               |         |    |               |                   |
| 66                                         | send_my_gift_card                                                        | I want to receive the \$100 Amazon Gift Card.                                                                                                                                                                                                              | yesno, Required <table border="1"> <tr> <td>1</td> <td>Yes</td> </tr> <tr> <td>0</td> <td>No</td> </tr> </table>                                                                                                                                                                                                                                                                                                                   | 1 | Yes        | 0        | No         |              |          |   |              |                                  |    |               |       |    |               |         |    |               |                   |
| 1                                          | Yes                                                                      |                                                                                                                                                                                                                                                            |                                                                                                                                                                                                                                                                                                                                                                                                                                    |   |            |          |            |              |          |   |              |                                  |    |               |       |    |               |         |    |               |                   |
| 0                                          | No                                                                       |                                                                                                                                                                                                                                                            |                                                                                                                                                                                                                                                                                                                                                                                                                                    |   |            |          |            |              |          |   |              |                                  |    |               |       |    |               |         |    |               |                   |
| 67                                         | vanderbilt_employee<br>Show the field ONLY if: [send_my_gift_card] = '1' | Are you a Vanderbilt University or Vanderbilt University Medical Center employee (faculty, staff, or other)?                                                                                                                                               | yesno, Required <table border="1"> <tr> <td>1</td> <td>Yes</td> </tr> <tr> <td>0</td> <td>No</td> </tr> </table>                                                                                                                                                                                                                                                                                                                   | 1 | Yes        | 0        | No         |              |          |   |              |                                  |    |               |       |    |               |         |    |               |                   |
| 1                                          | Yes                                                                      |                                                                                                                                                                                                                                                            |                                                                                                                                                                                                                                                                                                                                                                                                                                    |   |            |          |            |              |          |   |              |                                  |    |               |       |    |               |         |    |               |                   |
| 0                                          | No                                                                       |                                                                                                                                                                                                                                                            |                                                                                                                                                                                                                                                                                                                                                                                                                                    |   |            |          |            |              |          |   |              |                                  |    |               |       |    |               |         |    |               |                   |
| 68                                         | ssn<br>Show the field ONLY if: [vanderbilt_employee] = '1'               | Please provide your social security number.                                                                                                                                                                                                                | text, Required, Identifier                                                                                                                                                                                                                                                                                                                                                                                                         |   |            |          |            |              |          |   |              |                                  |    |               |       |    |               |         |    |               |                   |
| 69                                         | vu_finance<br>Show the field ONLY if: [send_my_gift_card] = '1'          | The Vanderbilt University Finance Department requires us to collect your name and address to issue your gift card. Your information will not be used for anything other than to send the gift card, and it will not be used after completion of the study. | descriptive                                                                                                                                                                                                                                                                                                                                                                                                                        |   |            |          |            |              |          |   |              |                                  |    |               |       |    |               |         |    |               |                   |
| 70                                         | first_name<br>Show the field ONLY if: [send_my_gift_card] = '1'          | First Name                                                                                                                                                                                                                                                 | text, Required, Identifier                                                                                                                                                                                                                                                                                                                                                                                                         |   |            |          |            |              |          |   |              |                                  |    |               |       |    |               |         |    |               |                   |
| 71                                         | middle_initial<br>Show the field ONLY if: [send_my_gift_card] = '1'      | Middle Initial                                                                                                                                                                                                                                             | text, Identifier                                                                                                                                                                                                                                                                                                                                                                                                                   |   |            |          |            |              |          |   |              |                                  |    |               |       |    |               |         |    |               |                   |
| 72                                         | last_name<br>Show the field ONLY if: [send_my_gift_card] = '1'           | Last Name                                                                                                                                                                                                                                                  | text, Required, Identifier                                                                                                                                                                                                                                                                                                                                                                                                         |   |            |          |            |              |          |   |              |                                  |    |               |       |    |               |         |    |               |                   |
| 73                                         | address_1                                                                | Address Line 1                                                                                                                                                                                                                                             | text, Required, Identifier                                                                                                                                                                                                                                                                                                                                                                                                         |   |            |          |            |              |          |   |              |                                  |    |               |       |    |               |         |    |               |                   |

|    |                                                                   |                |                                                                                                                                                                                                                                                                                                                                                                                                                                                                                                                                                                                                                                                                                                                                                                                                                                                                                                                                                                                                                                                                                                                                                       |   |         |   |        |   |                |   |         |   |          |   |            |   |          |   |             |   |          |    |                      |    |         |    |         |    |      |    |        |    |       |    |          |    |         |    |      |    |        |    |          |    |           |    |       |    |          |    |               |    |          |    |           |    |             |    |          |
|----|-------------------------------------------------------------------|----------------|-------------------------------------------------------------------------------------------------------------------------------------------------------------------------------------------------------------------------------------------------------------------------------------------------------------------------------------------------------------------------------------------------------------------------------------------------------------------------------------------------------------------------------------------------------------------------------------------------------------------------------------------------------------------------------------------------------------------------------------------------------------------------------------------------------------------------------------------------------------------------------------------------------------------------------------------------------------------------------------------------------------------------------------------------------------------------------------------------------------------------------------------------------|---|---------|---|--------|---|----------------|---|---------|---|----------|---|------------|---|----------|---|-------------|---|----------|----|----------------------|----|---------|----|---------|----|------|----|--------|----|-------|----|----------|----|---------|----|------|----|--------|----|----------|----|-----------|----|-------|----|----------|----|---------------|----|----------|----|-----------|----|-------------|----|----------|
|    | Show the field ONLY if:<br>[send_my_gift_card] = '1'              |                |                                                                                                                                                                                                                                                                                                                                                                                                                                                                                                                                                                                                                                                                                                                                                                                                                                                                                                                                                                                                                                                                                                                                                       |   |         |   |        |   |                |   |         |   |          |   |            |   |          |   |             |   |          |    |                      |    |         |    |         |    |      |    |        |    |       |    |          |    |         |    |      |    |        |    |          |    |           |    |       |    |          |    |               |    |          |    |           |    |             |    |          |
| 74 | address_2<br>Show the field ONLY if:<br>[send_my_gift_card] = '1' | Address Line 2 | text, Identifier                                                                                                                                                                                                                                                                                                                                                                                                                                                                                                                                                                                                                                                                                                                                                                                                                                                                                                                                                                                                                                                                                                                                      |   |         |   |        |   |                |   |         |   |          |   |            |   |          |   |             |   |          |    |                      |    |         |    |         |    |      |    |        |    |       |    |          |    |         |    |      |    |        |    |          |    |           |    |       |    |          |    |               |    |          |    |           |    |             |    |          |
| 75 | city<br>Show the field ONLY if:<br>[send_my_gift_card] = '1'      | City           | text, Required, Identifier                                                                                                                                                                                                                                                                                                                                                                                                                                                                                                                                                                                                                                                                                                                                                                                                                                                                                                                                                                                                                                                                                                                            |   |         |   |        |   |                |   |         |   |          |   |            |   |          |   |             |   |          |    |                      |    |         |    |         |    |      |    |        |    |       |    |          |    |         |    |      |    |        |    |          |    |           |    |       |    |          |    |               |    |          |    |           |    |             |    |          |
| 76 | state<br>Show the field ONLY if:<br>[send_my_gift_card] = '1'     | State          | dropdown, Required <table border="1"> <tr><td>1</td><td>Alabama</td></tr> <tr><td>2</td><td>Alaska</td></tr> <tr><td>3</td><td>American Samoa</td></tr> <tr><td>4</td><td>Arizona</td></tr> <tr><td>5</td><td>Arkansas</td></tr> <tr><td>6</td><td>California</td></tr> <tr><td>7</td><td>Colorado</td></tr> <tr><td>8</td><td>Connecticut</td></tr> <tr><td>9</td><td>Delaware</td></tr> <tr><td>10</td><td>District of Columbia</td></tr> <tr><td>11</td><td>Florida</td></tr> <tr><td>12</td><td>Georgia</td></tr> <tr><td>13</td><td>Guam</td></tr> <tr><td>14</td><td>Hawaii</td></tr> <tr><td>15</td><td>Idaho</td></tr> <tr><td>16</td><td>Illinois</td></tr> <tr><td>17</td><td>Indiana</td></tr> <tr><td>18</td><td>Iowa</td></tr> <tr><td>19</td><td>Kansas</td></tr> <tr><td>20</td><td>Kentucky</td></tr> <tr><td>21</td><td>Louisiana</td></tr> <tr><td>22</td><td>Maine</td></tr> <tr><td>23</td><td>Maryland</td></tr> <tr><td>24</td><td>Massachusetts</td></tr> <tr><td>25</td><td>Michigan</td></tr> <tr><td>26</td><td>Minnesota</td></tr> <tr><td>27</td><td>Mississippi</td></tr> <tr><td>28</td><td>Missouri</td></tr> </table> | 1 | Alabama | 2 | Alaska | 3 | American Samoa | 4 | Arizona | 5 | Arkansas | 6 | California | 7 | Colorado | 8 | Connecticut | 9 | Delaware | 10 | District of Columbia | 11 | Florida | 12 | Georgia | 13 | Guam | 14 | Hawaii | 15 | Idaho | 16 | Illinois | 17 | Indiana | 18 | Iowa | 19 | Kansas | 20 | Kentucky | 21 | Louisiana | 22 | Maine | 23 | Maryland | 24 | Massachusetts | 25 | Michigan | 26 | Minnesota | 27 | Mississippi | 28 | Missouri |
| 1  | Alabama                                                           |                |                                                                                                                                                                                                                                                                                                                                                                                                                                                                                                                                                                                                                                                                                                                                                                                                                                                                                                                                                                                                                                                                                                                                                       |   |         |   |        |   |                |   |         |   |          |   |            |   |          |   |             |   |          |    |                      |    |         |    |         |    |      |    |        |    |       |    |          |    |         |    |      |    |        |    |          |    |           |    |       |    |          |    |               |    |          |    |           |    |             |    |          |
| 2  | Alaska                                                            |                |                                                                                                                                                                                                                                                                                                                                                                                                                                                                                                                                                                                                                                                                                                                                                                                                                                                                                                                                                                                                                                                                                                                                                       |   |         |   |        |   |                |   |         |   |          |   |            |   |          |   |             |   |          |    |                      |    |         |    |         |    |      |    |        |    |       |    |          |    |         |    |      |    |        |    |          |    |           |    |       |    |          |    |               |    |          |    |           |    |             |    |          |
| 3  | American Samoa                                                    |                |                                                                                                                                                                                                                                                                                                                                                                                                                                                                                                                                                                                                                                                                                                                                                                                                                                                                                                                                                                                                                                                                                                                                                       |   |         |   |        |   |                |   |         |   |          |   |            |   |          |   |             |   |          |    |                      |    |         |    |         |    |      |    |        |    |       |    |          |    |         |    |      |    |        |    |          |    |           |    |       |    |          |    |               |    |          |    |           |    |             |    |          |
| 4  | Arizona                                                           |                |                                                                                                                                                                                                                                                                                                                                                                                                                                                                                                                                                                                                                                                                                                                                                                                                                                                                                                                                                                                                                                                                                                                                                       |   |         |   |        |   |                |   |         |   |          |   |            |   |          |   |             |   |          |    |                      |    |         |    |         |    |      |    |        |    |       |    |          |    |         |    |      |    |        |    |          |    |           |    |       |    |          |    |               |    |          |    |           |    |             |    |          |
| 5  | Arkansas                                                          |                |                                                                                                                                                                                                                                                                                                                                                                                                                                                                                                                                                                                                                                                                                                                                                                                                                                                                                                                                                                                                                                                                                                                                                       |   |         |   |        |   |                |   |         |   |          |   |            |   |          |   |             |   |          |    |                      |    |         |    |         |    |      |    |        |    |       |    |          |    |         |    |      |    |        |    |          |    |           |    |       |    |          |    |               |    |          |    |           |    |             |    |          |
| 6  | California                                                        |                |                                                                                                                                                                                                                                                                                                                                                                                                                                                                                                                                                                                                                                                                                                                                                                                                                                                                                                                                                                                                                                                                                                                                                       |   |         |   |        |   |                |   |         |   |          |   |            |   |          |   |             |   |          |    |                      |    |         |    |         |    |      |    |        |    |       |    |          |    |         |    |      |    |        |    |          |    |           |    |       |    |          |    |               |    |          |    |           |    |             |    |          |
| 7  | Colorado                                                          |                |                                                                                                                                                                                                                                                                                                                                                                                                                                                                                                                                                                                                                                                                                                                                                                                                                                                                                                                                                                                                                                                                                                                                                       |   |         |   |        |   |                |   |         |   |          |   |            |   |          |   |             |   |          |    |                      |    |         |    |         |    |      |    |        |    |       |    |          |    |         |    |      |    |        |    |          |    |           |    |       |    |          |    |               |    |          |    |           |    |             |    |          |
| 8  | Connecticut                                                       |                |                                                                                                                                                                                                                                                                                                                                                                                                                                                                                                                                                                                                                                                                                                                                                                                                                                                                                                                                                                                                                                                                                                                                                       |   |         |   |        |   |                |   |         |   |          |   |            |   |          |   |             |   |          |    |                      |    |         |    |         |    |      |    |        |    |       |    |          |    |         |    |      |    |        |    |          |    |           |    |       |    |          |    |               |    |          |    |           |    |             |    |          |
| 9  | Delaware                                                          |                |                                                                                                                                                                                                                                                                                                                                                                                                                                                                                                                                                                                                                                                                                                                                                                                                                                                                                                                                                                                                                                                                                                                                                       |   |         |   |        |   |                |   |         |   |          |   |            |   |          |   |             |   |          |    |                      |    |         |    |         |    |      |    |        |    |       |    |          |    |         |    |      |    |        |    |          |    |           |    |       |    |          |    |               |    |          |    |           |    |             |    |          |
| 10 | District of Columbia                                              |                |                                                                                                                                                                                                                                                                                                                                                                                                                                                                                                                                                                                                                                                                                                                                                                                                                                                                                                                                                                                                                                                                                                                                                       |   |         |   |        |   |                |   |         |   |          |   |            |   |          |   |             |   |          |    |                      |    |         |    |         |    |      |    |        |    |       |    |          |    |         |    |      |    |        |    |          |    |           |    |       |    |          |    |               |    |          |    |           |    |             |    |          |
| 11 | Florida                                                           |                |                                                                                                                                                                                                                                                                                                                                                                                                                                                                                                                                                                                                                                                                                                                                                                                                                                                                                                                                                                                                                                                                                                                                                       |   |         |   |        |   |                |   |         |   |          |   |            |   |          |   |             |   |          |    |                      |    |         |    |         |    |      |    |        |    |       |    |          |    |         |    |      |    |        |    |          |    |           |    |       |    |          |    |               |    |          |    |           |    |             |    |          |
| 12 | Georgia                                                           |                |                                                                                                                                                                                                                                                                                                                                                                                                                                                                                                                                                                                                                                                                                                                                                                                                                                                                                                                                                                                                                                                                                                                                                       |   |         |   |        |   |                |   |         |   |          |   |            |   |          |   |             |   |          |    |                      |    |         |    |         |    |      |    |        |    |       |    |          |    |         |    |      |    |        |    |          |    |           |    |       |    |          |    |               |    |          |    |           |    |             |    |          |
| 13 | Guam                                                              |                |                                                                                                                                                                                                                                                                                                                                                                                                                                                                                                                                                                                                                                                                                                                                                                                                                                                                                                                                                                                                                                                                                                                                                       |   |         |   |        |   |                |   |         |   |          |   |            |   |          |   |             |   |          |    |                      |    |         |    |         |    |      |    |        |    |       |    |          |    |         |    |      |    |        |    |          |    |           |    |       |    |          |    |               |    |          |    |           |    |             |    |          |
| 14 | Hawaii                                                            |                |                                                                                                                                                                                                                                                                                                                                                                                                                                                                                                                                                                                                                                                                                                                                                                                                                                                                                                                                                                                                                                                                                                                                                       |   |         |   |        |   |                |   |         |   |          |   |            |   |          |   |             |   |          |    |                      |    |         |    |         |    |      |    |        |    |       |    |          |    |         |    |      |    |        |    |          |    |           |    |       |    |          |    |               |    |          |    |           |    |             |    |          |
| 15 | Idaho                                                             |                |                                                                                                                                                                                                                                                                                                                                                                                                                                                                                                                                                                                                                                                                                                                                                                                                                                                                                                                                                                                                                                                                                                                                                       |   |         |   |        |   |                |   |         |   |          |   |            |   |          |   |             |   |          |    |                      |    |         |    |         |    |      |    |        |    |       |    |          |    |         |    |      |    |        |    |          |    |           |    |       |    |          |    |               |    |          |    |           |    |             |    |          |
| 16 | Illinois                                                          |                |                                                                                                                                                                                                                                                                                                                                                                                                                                                                                                                                                                                                                                                                                                                                                                                                                                                                                                                                                                                                                                                                                                                                                       |   |         |   |        |   |                |   |         |   |          |   |            |   |          |   |             |   |          |    |                      |    |         |    |         |    |      |    |        |    |       |    |          |    |         |    |      |    |        |    |          |    |           |    |       |    |          |    |               |    |          |    |           |    |             |    |          |
| 17 | Indiana                                                           |                |                                                                                                                                                                                                                                                                                                                                                                                                                                                                                                                                                                                                                                                                                                                                                                                                                                                                                                                                                                                                                                                                                                                                                       |   |         |   |        |   |                |   |         |   |          |   |            |   |          |   |             |   |          |    |                      |    |         |    |         |    |      |    |        |    |       |    |          |    |         |    |      |    |        |    |          |    |           |    |       |    |          |    |               |    |          |    |           |    |             |    |          |
| 18 | Iowa                                                              |                |                                                                                                                                                                                                                                                                                                                                                                                                                                                                                                                                                                                                                                                                                                                                                                                                                                                                                                                                                                                                                                                                                                                                                       |   |         |   |        |   |                |   |         |   |          |   |            |   |          |   |             |   |          |    |                      |    |         |    |         |    |      |    |        |    |       |    |          |    |         |    |      |    |        |    |          |    |           |    |       |    |          |    |               |    |          |    |           |    |             |    |          |
| 19 | Kansas                                                            |                |                                                                                                                                                                                                                                                                                                                                                                                                                                                                                                                                                                                                                                                                                                                                                                                                                                                                                                                                                                                                                                                                                                                                                       |   |         |   |        |   |                |   |         |   |          |   |            |   |          |   |             |   |          |    |                      |    |         |    |         |    |      |    |        |    |       |    |          |    |         |    |      |    |        |    |          |    |           |    |       |    |          |    |               |    |          |    |           |    |             |    |          |
| 20 | Kentucky                                                          |                |                                                                                                                                                                                                                                                                                                                                                                                                                                                                                                                                                                                                                                                                                                                                                                                                                                                                                                                                                                                                                                                                                                                                                       |   |         |   |        |   |                |   |         |   |          |   |            |   |          |   |             |   |          |    |                      |    |         |    |         |    |      |    |        |    |       |    |          |    |         |    |      |    |        |    |          |    |           |    |       |    |          |    |               |    |          |    |           |    |             |    |          |
| 21 | Louisiana                                                         |                |                                                                                                                                                                                                                                                                                                                                                                                                                                                                                                                                                                                                                                                                                                                                                                                                                                                                                                                                                                                                                                                                                                                                                       |   |         |   |        |   |                |   |         |   |          |   |            |   |          |   |             |   |          |    |                      |    |         |    |         |    |      |    |        |    |       |    |          |    |         |    |      |    |        |    |          |    |           |    |       |    |          |    |               |    |          |    |           |    |             |    |          |
| 22 | Maine                                                             |                |                                                                                                                                                                                                                                                                                                                                                                                                                                                                                                                                                                                                                                                                                                                                                                                                                                                                                                                                                                                                                                                                                                                                                       |   |         |   |        |   |                |   |         |   |          |   |            |   |          |   |             |   |          |    |                      |    |         |    |         |    |      |    |        |    |       |    |          |    |         |    |      |    |        |    |          |    |           |    |       |    |          |    |               |    |          |    |           |    |             |    |          |
| 23 | Maryland                                                          |                |                                                                                                                                                                                                                                                                                                                                                                                                                                                                                                                                                                                                                                                                                                                                                                                                                                                                                                                                                                                                                                                                                                                                                       |   |         |   |        |   |                |   |         |   |          |   |            |   |          |   |             |   |          |    |                      |    |         |    |         |    |      |    |        |    |       |    |          |    |         |    |      |    |        |    |          |    |           |    |       |    |          |    |               |    |          |    |           |    |             |    |          |
| 24 | Massachusetts                                                     |                |                                                                                                                                                                                                                                                                                                                                                                                                                                                                                                                                                                                                                                                                                                                                                                                                                                                                                                                                                                                                                                                                                                                                                       |   |         |   |        |   |                |   |         |   |          |   |            |   |          |   |             |   |          |    |                      |    |         |    |         |    |      |    |        |    |       |    |          |    |         |    |      |    |        |    |          |    |           |    |       |    |          |    |               |    |          |    |           |    |             |    |          |
| 25 | Michigan                                                          |                |                                                                                                                                                                                                                                                                                                                                                                                                                                                                                                                                                                                                                                                                                                                                                                                                                                                                                                                                                                                                                                                                                                                                                       |   |         |   |        |   |                |   |         |   |          |   |            |   |          |   |             |   |          |    |                      |    |         |    |         |    |      |    |        |    |       |    |          |    |         |    |      |    |        |    |          |    |           |    |       |    |          |    |               |    |          |    |           |    |             |    |          |
| 26 | Minnesota                                                         |                |                                                                                                                                                                                                                                                                                                                                                                                                                                                                                                                                                                                                                                                                                                                                                                                                                                                                                                                                                                                                                                                                                                                                                       |   |         |   |        |   |                |   |         |   |          |   |            |   |          |   |             |   |          |    |                      |    |         |    |         |    |      |    |        |    |       |    |          |    |         |    |      |    |        |    |          |    |           |    |       |    |          |    |               |    |          |    |           |    |             |    |          |
| 27 | Mississippi                                                       |                |                                                                                                                                                                                                                                                                                                                                                                                                                                                                                                                                                                                                                                                                                                                                                                                                                                                                                                                                                                                                                                                                                                                                                       |   |         |   |        |   |                |   |         |   |          |   |            |   |          |   |             |   |          |    |                      |    |         |    |         |    |      |    |        |    |       |    |          |    |         |    |      |    |        |    |          |    |           |    |       |    |          |    |               |    |          |    |           |    |             |    |          |
| 28 | Missouri                                                          |                |                                                                                                                                                                                                                                                                                                                                                                                                                                                                                                                                                                                                                                                                                                                                                                                                                                                                                                                                                                                                                                                                                                                                                       |   |         |   |        |   |                |   |         |   |          |   |            |   |          |   |             |   |          |    |                      |    |         |    |         |    |      |    |        |    |       |    |          |    |         |    |      |    |        |    |          |    |           |    |       |    |          |    |               |    |          |    |           |    |             |    |          |

|    |                                                                                                                                                         |                                                              |                                                                                                                                                                                                                                                                                                                                                                                                                                                                                                                                                                                                                                                                                                                                                                                                                                                                                                                                                                                                                                                                                                                                                                                           |    |         |    |          |    |        |    |               |    |            |    |            |    |          |    |                |    |              |    |                           |    |      |    |          |    |        |    |              |    |             |    |              |    |                |    |              |    |           |    |       |    |      |    |         |    |          |    |                |    |            |    |               |    |           |    |         |
|----|---------------------------------------------------------------------------------------------------------------------------------------------------------|--------------------------------------------------------------|-------------------------------------------------------------------------------------------------------------------------------------------------------------------------------------------------------------------------------------------------------------------------------------------------------------------------------------------------------------------------------------------------------------------------------------------------------------------------------------------------------------------------------------------------------------------------------------------------------------------------------------------------------------------------------------------------------------------------------------------------------------------------------------------------------------------------------------------------------------------------------------------------------------------------------------------------------------------------------------------------------------------------------------------------------------------------------------------------------------------------------------------------------------------------------------------|----|---------|----|----------|----|--------|----|---------------|----|------------|----|------------|----|----------|----|----------------|----|--------------|----|---------------------------|----|------|----|----------|----|--------|----|--------------|----|-------------|----|--------------|----|----------------|----|--------------|----|-----------|----|-------|----|------|----|---------|----|----------|----|----------------|----|------------|----|---------------|----|-----------|----|---------|
|    |                                                                                                                                                         |                                                              | <table border="1"> <tr><td>29</td><td>Montana</td></tr> <tr><td>30</td><td>Nebraska</td></tr> <tr><td>31</td><td>Nevada</td></tr> <tr><td>32</td><td>New Hampshire</td></tr> <tr><td>33</td><td>New Jersey</td></tr> <tr><td>34</td><td>New Mexico</td></tr> <tr><td>35</td><td>New York</td></tr> <tr><td>36</td><td>North Carolina</td></tr> <tr><td>37</td><td>North Dakota</td></tr> <tr><td>38</td><td>Northern Marianas Islands</td></tr> <tr><td>39</td><td>Ohio</td></tr> <tr><td>40</td><td>Oklahoma</td></tr> <tr><td>41</td><td>Oregon</td></tr> <tr><td>42</td><td>Pennsylvania</td></tr> <tr><td>43</td><td>Puerto Rico</td></tr> <tr><td>44</td><td>Rhode Island</td></tr> <tr><td>45</td><td>South Carolina</td></tr> <tr><td>46</td><td>South Dakota</td></tr> <tr><td>47</td><td>Tennessee</td></tr> <tr><td>48</td><td>Texas</td></tr> <tr><td>49</td><td>Utah</td></tr> <tr><td>50</td><td>Vermont</td></tr> <tr><td>51</td><td>Virginia</td></tr> <tr><td>52</td><td>Virgin Islands</td></tr> <tr><td>53</td><td>Washington</td></tr> <tr><td>54</td><td>West Virginia</td></tr> <tr><td>55</td><td>Wisconsin</td></tr> <tr><td>56</td><td>Wyoming</td></tr> </table> | 29 | Montana | 30 | Nebraska | 31 | Nevada | 32 | New Hampshire | 33 | New Jersey | 34 | New Mexico | 35 | New York | 36 | North Carolina | 37 | North Dakota | 38 | Northern Marianas Islands | 39 | Ohio | 40 | Oklahoma | 41 | Oregon | 42 | Pennsylvania | 43 | Puerto Rico | 44 | Rhode Island | 45 | South Carolina | 46 | South Dakota | 47 | Tennessee | 48 | Texas | 49 | Utah | 50 | Vermont | 51 | Virginia | 52 | Virgin Islands | 53 | Washington | 54 | West Virginia | 55 | Wisconsin | 56 | Wyoming |
| 29 | Montana                                                                                                                                                 |                                                              |                                                                                                                                                                                                                                                                                                                                                                                                                                                                                                                                                                                                                                                                                                                                                                                                                                                                                                                                                                                                                                                                                                                                                                                           |    |         |    |          |    |        |    |               |    |            |    |            |    |          |    |                |    |              |    |                           |    |      |    |          |    |        |    |              |    |             |    |              |    |                |    |              |    |           |    |       |    |      |    |         |    |          |    |                |    |            |    |               |    |           |    |         |
| 30 | Nebraska                                                                                                                                                |                                                              |                                                                                                                                                                                                                                                                                                                                                                                                                                                                                                                                                                                                                                                                                                                                                                                                                                                                                                                                                                                                                                                                                                                                                                                           |    |         |    |          |    |        |    |               |    |            |    |            |    |          |    |                |    |              |    |                           |    |      |    |          |    |        |    |              |    |             |    |              |    |                |    |              |    |           |    |       |    |      |    |         |    |          |    |                |    |            |    |               |    |           |    |         |
| 31 | Nevada                                                                                                                                                  |                                                              |                                                                                                                                                                                                                                                                                                                                                                                                                                                                                                                                                                                                                                                                                                                                                                                                                                                                                                                                                                                                                                                                                                                                                                                           |    |         |    |          |    |        |    |               |    |            |    |            |    |          |    |                |    |              |    |                           |    |      |    |          |    |        |    |              |    |             |    |              |    |                |    |              |    |           |    |       |    |      |    |         |    |          |    |                |    |            |    |               |    |           |    |         |
| 32 | New Hampshire                                                                                                                                           |                                                              |                                                                                                                                                                                                                                                                                                                                                                                                                                                                                                                                                                                                                                                                                                                                                                                                                                                                                                                                                                                                                                                                                                                                                                                           |    |         |    |          |    |        |    |               |    |            |    |            |    |          |    |                |    |              |    |                           |    |      |    |          |    |        |    |              |    |             |    |              |    |                |    |              |    |           |    |       |    |      |    |         |    |          |    |                |    |            |    |               |    |           |    |         |
| 33 | New Jersey                                                                                                                                              |                                                              |                                                                                                                                                                                                                                                                                                                                                                                                                                                                                                                                                                                                                                                                                                                                                                                                                                                                                                                                                                                                                                                                                                                                                                                           |    |         |    |          |    |        |    |               |    |            |    |            |    |          |    |                |    |              |    |                           |    |      |    |          |    |        |    |              |    |             |    |              |    |                |    |              |    |           |    |       |    |      |    |         |    |          |    |                |    |            |    |               |    |           |    |         |
| 34 | New Mexico                                                                                                                                              |                                                              |                                                                                                                                                                                                                                                                                                                                                                                                                                                                                                                                                                                                                                                                                                                                                                                                                                                                                                                                                                                                                                                                                                                                                                                           |    |         |    |          |    |        |    |               |    |            |    |            |    |          |    |                |    |              |    |                           |    |      |    |          |    |        |    |              |    |             |    |              |    |                |    |              |    |           |    |       |    |      |    |         |    |          |    |                |    |            |    |               |    |           |    |         |
| 35 | New York                                                                                                                                                |                                                              |                                                                                                                                                                                                                                                                                                                                                                                                                                                                                                                                                                                                                                                                                                                                                                                                                                                                                                                                                                                                                                                                                                                                                                                           |    |         |    |          |    |        |    |               |    |            |    |            |    |          |    |                |    |              |    |                           |    |      |    |          |    |        |    |              |    |             |    |              |    |                |    |              |    |           |    |       |    |      |    |         |    |          |    |                |    |            |    |               |    |           |    |         |
| 36 | North Carolina                                                                                                                                          |                                                              |                                                                                                                                                                                                                                                                                                                                                                                                                                                                                                                                                                                                                                                                                                                                                                                                                                                                                                                                                                                                                                                                                                                                                                                           |    |         |    |          |    |        |    |               |    |            |    |            |    |          |    |                |    |              |    |                           |    |      |    |          |    |        |    |              |    |             |    |              |    |                |    |              |    |           |    |       |    |      |    |         |    |          |    |                |    |            |    |               |    |           |    |         |
| 37 | North Dakota                                                                                                                                            |                                                              |                                                                                                                                                                                                                                                                                                                                                                                                                                                                                                                                                                                                                                                                                                                                                                                                                                                                                                                                                                                                                                                                                                                                                                                           |    |         |    |          |    |        |    |               |    |            |    |            |    |          |    |                |    |              |    |                           |    |      |    |          |    |        |    |              |    |             |    |              |    |                |    |              |    |           |    |       |    |      |    |         |    |          |    |                |    |            |    |               |    |           |    |         |
| 38 | Northern Marianas Islands                                                                                                                               |                                                              |                                                                                                                                                                                                                                                                                                                                                                                                                                                                                                                                                                                                                                                                                                                                                                                                                                                                                                                                                                                                                                                                                                                                                                                           |    |         |    |          |    |        |    |               |    |            |    |            |    |          |    |                |    |              |    |                           |    |      |    |          |    |        |    |              |    |             |    |              |    |                |    |              |    |           |    |       |    |      |    |         |    |          |    |                |    |            |    |               |    |           |    |         |
| 39 | Ohio                                                                                                                                                    |                                                              |                                                                                                                                                                                                                                                                                                                                                                                                                                                                                                                                                                                                                                                                                                                                                                                                                                                                                                                                                                                                                                                                                                                                                                                           |    |         |    |          |    |        |    |               |    |            |    |            |    |          |    |                |    |              |    |                           |    |      |    |          |    |        |    |              |    |             |    |              |    |                |    |              |    |           |    |       |    |      |    |         |    |          |    |                |    |            |    |               |    |           |    |         |
| 40 | Oklahoma                                                                                                                                                |                                                              |                                                                                                                                                                                                                                                                                                                                                                                                                                                                                                                                                                                                                                                                                                                                                                                                                                                                                                                                                                                                                                                                                                                                                                                           |    |         |    |          |    |        |    |               |    |            |    |            |    |          |    |                |    |              |    |                           |    |      |    |          |    |        |    |              |    |             |    |              |    |                |    |              |    |           |    |       |    |      |    |         |    |          |    |                |    |            |    |               |    |           |    |         |
| 41 | Oregon                                                                                                                                                  |                                                              |                                                                                                                                                                                                                                                                                                                                                                                                                                                                                                                                                                                                                                                                                                                                                                                                                                                                                                                                                                                                                                                                                                                                                                                           |    |         |    |          |    |        |    |               |    |            |    |            |    |          |    |                |    |              |    |                           |    |      |    |          |    |        |    |              |    |             |    |              |    |                |    |              |    |           |    |       |    |      |    |         |    |          |    |                |    |            |    |               |    |           |    |         |
| 42 | Pennsylvania                                                                                                                                            |                                                              |                                                                                                                                                                                                                                                                                                                                                                                                                                                                                                                                                                                                                                                                                                                                                                                                                                                                                                                                                                                                                                                                                                                                                                                           |    |         |    |          |    |        |    |               |    |            |    |            |    |          |    |                |    |              |    |                           |    |      |    |          |    |        |    |              |    |             |    |              |    |                |    |              |    |           |    |       |    |      |    |         |    |          |    |                |    |            |    |               |    |           |    |         |
| 43 | Puerto Rico                                                                                                                                             |                                                              |                                                                                                                                                                                                                                                                                                                                                                                                                                                                                                                                                                                                                                                                                                                                                                                                                                                                                                                                                                                                                                                                                                                                                                                           |    |         |    |          |    |        |    |               |    |            |    |            |    |          |    |                |    |              |    |                           |    |      |    |          |    |        |    |              |    |             |    |              |    |                |    |              |    |           |    |       |    |      |    |         |    |          |    |                |    |            |    |               |    |           |    |         |
| 44 | Rhode Island                                                                                                                                            |                                                              |                                                                                                                                                                                                                                                                                                                                                                                                                                                                                                                                                                                                                                                                                                                                                                                                                                                                                                                                                                                                                                                                                                                                                                                           |    |         |    |          |    |        |    |               |    |            |    |            |    |          |    |                |    |              |    |                           |    |      |    |          |    |        |    |              |    |             |    |              |    |                |    |              |    |           |    |       |    |      |    |         |    |          |    |                |    |            |    |               |    |           |    |         |
| 45 | South Carolina                                                                                                                                          |                                                              |                                                                                                                                                                                                                                                                                                                                                                                                                                                                                                                                                                                                                                                                                                                                                                                                                                                                                                                                                                                                                                                                                                                                                                                           |    |         |    |          |    |        |    |               |    |            |    |            |    |          |    |                |    |              |    |                           |    |      |    |          |    |        |    |              |    |             |    |              |    |                |    |              |    |           |    |       |    |      |    |         |    |          |    |                |    |            |    |               |    |           |    |         |
| 46 | South Dakota                                                                                                                                            |                                                              |                                                                                                                                                                                                                                                                                                                                                                                                                                                                                                                                                                                                                                                                                                                                                                                                                                                                                                                                                                                                                                                                                                                                                                                           |    |         |    |          |    |        |    |               |    |            |    |            |    |          |    |                |    |              |    |                           |    |      |    |          |    |        |    |              |    |             |    |              |    |                |    |              |    |           |    |       |    |      |    |         |    |          |    |                |    |            |    |               |    |           |    |         |
| 47 | Tennessee                                                                                                                                               |                                                              |                                                                                                                                                                                                                                                                                                                                                                                                                                                                                                                                                                                                                                                                                                                                                                                                                                                                                                                                                                                                                                                                                                                                                                                           |    |         |    |          |    |        |    |               |    |            |    |            |    |          |    |                |    |              |    |                           |    |      |    |          |    |        |    |              |    |             |    |              |    |                |    |              |    |           |    |       |    |      |    |         |    |          |    |                |    |            |    |               |    |           |    |         |
| 48 | Texas                                                                                                                                                   |                                                              |                                                                                                                                                                                                                                                                                                                                                                                                                                                                                                                                                                                                                                                                                                                                                                                                                                                                                                                                                                                                                                                                                                                                                                                           |    |         |    |          |    |        |    |               |    |            |    |            |    |          |    |                |    |              |    |                           |    |      |    |          |    |        |    |              |    |             |    |              |    |                |    |              |    |           |    |       |    |      |    |         |    |          |    |                |    |            |    |               |    |           |    |         |
| 49 | Utah                                                                                                                                                    |                                                              |                                                                                                                                                                                                                                                                                                                                                                                                                                                                                                                                                                                                                                                                                                                                                                                                                                                                                                                                                                                                                                                                                                                                                                                           |    |         |    |          |    |        |    |               |    |            |    |            |    |          |    |                |    |              |    |                           |    |      |    |          |    |        |    |              |    |             |    |              |    |                |    |              |    |           |    |       |    |      |    |         |    |          |    |                |    |            |    |               |    |           |    |         |
| 50 | Vermont                                                                                                                                                 |                                                              |                                                                                                                                                                                                                                                                                                                                                                                                                                                                                                                                                                                                                                                                                                                                                                                                                                                                                                                                                                                                                                                                                                                                                                                           |    |         |    |          |    |        |    |               |    |            |    |            |    |          |    |                |    |              |    |                           |    |      |    |          |    |        |    |              |    |             |    |              |    |                |    |              |    |           |    |       |    |      |    |         |    |          |    |                |    |            |    |               |    |           |    |         |
| 51 | Virginia                                                                                                                                                |                                                              |                                                                                                                                                                                                                                                                                                                                                                                                                                                                                                                                                                                                                                                                                                                                                                                                                                                                                                                                                                                                                                                                                                                                                                                           |    |         |    |          |    |        |    |               |    |            |    |            |    |          |    |                |    |              |    |                           |    |      |    |          |    |        |    |              |    |             |    |              |    |                |    |              |    |           |    |       |    |      |    |         |    |          |    |                |    |            |    |               |    |           |    |         |
| 52 | Virgin Islands                                                                                                                                          |                                                              |                                                                                                                                                                                                                                                                                                                                                                                                                                                                                                                                                                                                                                                                                                                                                                                                                                                                                                                                                                                                                                                                                                                                                                                           |    |         |    |          |    |        |    |               |    |            |    |            |    |          |    |                |    |              |    |                           |    |      |    |          |    |        |    |              |    |             |    |              |    |                |    |              |    |           |    |       |    |      |    |         |    |          |    |                |    |            |    |               |    |           |    |         |
| 53 | Washington                                                                                                                                              |                                                              |                                                                                                                                                                                                                                                                                                                                                                                                                                                                                                                                                                                                                                                                                                                                                                                                                                                                                                                                                                                                                                                                                                                                                                                           |    |         |    |          |    |        |    |               |    |            |    |            |    |          |    |                |    |              |    |                           |    |      |    |          |    |        |    |              |    |             |    |              |    |                |    |              |    |           |    |       |    |      |    |         |    |          |    |                |    |            |    |               |    |           |    |         |
| 54 | West Virginia                                                                                                                                           |                                                              |                                                                                                                                                                                                                                                                                                                                                                                                                                                                                                                                                                                                                                                                                                                                                                                                                                                                                                                                                                                                                                                                                                                                                                                           |    |         |    |          |    |        |    |               |    |            |    |            |    |          |    |                |    |              |    |                           |    |      |    |          |    |        |    |              |    |             |    |              |    |                |    |              |    |           |    |       |    |      |    |         |    |          |    |                |    |            |    |               |    |           |    |         |
| 55 | Wisconsin                                                                                                                                               |                                                              |                                                                                                                                                                                                                                                                                                                                                                                                                                                                                                                                                                                                                                                                                                                                                                                                                                                                                                                                                                                                                                                                                                                                                                                           |    |         |    |          |    |        |    |               |    |            |    |            |    |          |    |                |    |              |    |                           |    |      |    |          |    |        |    |              |    |             |    |              |    |                |    |              |    |           |    |       |    |      |    |         |    |          |    |                |    |            |    |               |    |           |    |         |
| 56 | Wyoming                                                                                                                                                 |                                                              |                                                                                                                                                                                                                                                                                                                                                                                                                                                                                                                                                                                                                                                                                                                                                                                                                                                                                                                                                                                                                                                                                                                                                                                           |    |         |    |          |    |        |    |               |    |            |    |            |    |          |    |                |    |              |    |                           |    |      |    |          |    |        |    |              |    |             |    |              |    |                |    |              |    |           |    |       |    |      |    |         |    |          |    |                |    |            |    |               |    |           |    |         |
| 77 | zip<br>Show the field ONLY if:<br>[send_my_gift_card] = '1'                                                                                             | ZIP Code                                                     | text, Identifier                                                                                                                                                                                                                                                                                                                                                                                                                                                                                                                                                                                                                                                                                                                                                                                                                                                                                                                                                                                                                                                                                                                                                                          |    |         |    |          |    |        |    |               |    |            |    |            |    |          |    |                |    |              |    |                           |    |      |    |          |    |        |    |              |    |             |    |              |    |                |    |              |    |           |    |       |    |      |    |         |    |          |    |                |    |            |    |               |    |           |    |         |
| 78 | md_nonphysician<br>Show the field ONLY if:<br>[send_my_gift_card] = '1'<br>and ([enrollment_arm_1]<br>[role_description] = '2' or<br>[enrollment_arm_1] | I have an M.D. or equivalent<br>degree (e.g., D.O., M.B.B.S) | yesno, Required<br><table border="1"> <tr><td>1</td><td>Yes</td></tr> <tr><td>0</td><td>No</td></tr> </table>                                                                                                                                                                                                                                                                                                                                                                                                                                                                                                                                                                                                                                                                                                                                                                                                                                                                                                                                                                                                                                                                             | 1  | Yes     | 0  | No       |    |        |    |               |    |            |    |            |    |          |    |                |    |              |    |                           |    |      |    |          |    |        |    |              |    |             |    |              |    |                |    |              |    |           |    |       |    |      |    |         |    |          |    |                |    |            |    |               |    |           |    |         |
| 1  | Yes                                                                                                                                                     |                                                              |                                                                                                                                                                                                                                                                                                                                                                                                                                                                                                                                                                                                                                                                                                                                                                                                                                                                                                                                                                                                                                                                                                                                                                                           |    |         |    |          |    |        |    |               |    |            |    |            |    |          |    |                |    |              |    |                           |    |      |    |          |    |        |    |              |    |             |    |              |    |                |    |              |    |           |    |       |    |      |    |         |    |          |    |                |    |            |    |               |    |           |    |         |
| 0  | No                                                                                                                                                      |                                                              |                                                                                                                                                                                                                                                                                                                                                                                                                                                                                                                                                                                                                                                                                                                                                                                                                                                                                                                                                                                                                                                                                                                                                                                           |    |         |    |          |    |        |    |               |    |            |    |            |    |          |    |                |    |              |    |                           |    |      |    |          |    |        |    |              |    |             |    |              |    |                |    |              |    |           |    |       |    |      |    |         |    |          |    |                |    |            |    |               |    |           |    |         |

|    |                                                                                                                                                                                          |                                                                                                                                                                                                                                                                                                                                                                                                                           |                                                                                                                                                                                                     |   |      |   |      |   |          |   |       |
|----|------------------------------------------------------------------------------------------------------------------------------------------------------------------------------------------|---------------------------------------------------------------------------------------------------------------------------------------------------------------------------------------------------------------------------------------------------------------------------------------------------------------------------------------------------------------------------------------------------------------------------|-----------------------------------------------------------------------------------------------------------------------------------------------------------------------------------------------------|---|------|---|------|---|----------|---|-------|
|    | [role_description] = '3' or<br>[enrollment_arm_1]<br>[role_description] = '4' or<br>[enrollment_arm_1]<br>[role_description] = '5' or<br>[enrollment_arm_1]<br>[role_description] = '6') |                                                                                                                                                                                                                                                                                                                                                                                                                           |                                                                                                                                                                                                     |   |      |   |      |   |          |   |       |
| 79 | country<br>Show the field ONLY if:<br>[send_my_gift_card] = '1'<br>and ([enrollment_arm_1]<br>[role_description] = '1' or<br>[md_nonphysician] = '1')                                    | Are you legally authorized to<br>practice medicine in the United<br>States?                                                                                                                                                                                                                                                                                                                                               | yesno, Required<br><table border="1"> <tr> <td>1</td> <td>Yes</td> </tr> <tr> <td>0</td> <td>No</td> </tr> </table>                                                                                 | 1 | Yes  | 0 | No   |   |          |   |       |
| 1  | Yes                                                                                                                                                                                      |                                                                                                                                                                                                                                                                                                                                                                                                                           |                                                                                                                                                                                                     |   |      |   |      |   |          |   |       |
| 0  | No                                                                                                                                                                                       |                                                                                                                                                                                                                                                                                                                                                                                                                           |                                                                                                                                                                                                     |   |      |   |      |   |          |   |       |
| 80 | sunshine_act<br>Show the field ONLY if:<br>[country] = '1' AND<br>[send_my_gift_card] = '1'<br>AND ([enrollment_arm_1]<br>[role_description] = '1' or<br>[md_nonphysician] = '1')        | Because this study is funded by<br>Pfizer, we are required to collect<br>information from physicians to<br>fulfill the Sunshine Act<br>reporting requirements to send<br>out the Amazon gift cards.<br>Please fill out the information<br>below to receive your card. Your<br>information will not be used for<br>anything other than to send the<br>gift card, and it will not be used<br>after completion of the study. | descriptive                                                                                                                                                                                         |   |      |   |      |   |          |   |       |
| 81 | credential<br>Show the field ONLY if:<br>[country] = '1' and<br>([enrollment_arm_1]<br>[role_description] = '1' or<br>[md_nonphysician] = '1')                                           | Credential                                                                                                                                                                                                                                                                                                                                                                                                                | radio, Required<br><table border="1"> <tr> <td>1</td> <td>M.D.</td> </tr> <tr> <td>2</td> <td>D.O.</td> </tr> <tr> <td>3</td> <td>M.B.B.S.</td> </tr> <tr> <td>4</td> <td>Other</td> </tr> </table> | 1 | M.D. | 2 | D.O. | 3 | M.B.B.S. | 4 | Other |
| 1  | M.D.                                                                                                                                                                                     |                                                                                                                                                                                                                                                                                                                                                                                                                           |                                                                                                                                                                                                     |   |      |   |      |   |          |   |       |
| 2  | D.O.                                                                                                                                                                                     |                                                                                                                                                                                                                                                                                                                                                                                                                           |                                                                                                                                                                                                     |   |      |   |      |   |          |   |       |
| 3  | M.B.B.S.                                                                                                                                                                                 |                                                                                                                                                                                                                                                                                                                                                                                                                           |                                                                                                                                                                                                     |   |      |   |      |   |          |   |       |
| 4  | Other                                                                                                                                                                                    |                                                                                                                                                                                                                                                                                                                                                                                                                           |                                                                                                                                                                                                     |   |      |   |      |   |          |   |       |
| 82 | other_credential<br>Show the field ONLY if:<br>[credential] = '4'                                                                                                                        | If you selected other, please<br>explain:                                                                                                                                                                                                                                                                                                                                                                                 | text, Required                                                                                                                                                                                      |   |      |   |      |   |          |   |       |
| 83 | npi_id<br>Show the field ONLY if:<br>[country] = '1' and<br>([enrollment_arm_1]<br>[role_description] = '1' or<br>[md_nonphysician] = '1')                                               | NPI ID<br><i>Please note that we will not be<br/>able to send out the \$100<br/>Amazon gift card without your<br/>NPI ID. If you do not remember<br/>your NPI ID, please look it up<br/>using this link: NPI Registry<br/>Search</i>                                                                                                                                                                                      | text (integer), Required, Identifier                                                                                                                                                                |   |      |   |      |   |          |   |       |
| 84 | amazon_disclaimer_2                                                                                                                                                                      | *Amazon.com is not a sponsor<br>of this promotion. Except as<br>required by law, Amazon.com<br>Gift Cards ("GCs") cannot be<br>transferred for value or<br>redeemed for cash. GCs may be<br>used only for purchases of<br>eligible goods at Amazon.com                                                                                                                                                                    | descriptive                                                                                                                                                                                         |   |      |   |      |   |          |   |       |



|    |                           |                                                                                                                                                                                                                                                                                                                              |                                                                                                                                                                  |   |            |   |            |   |          |
|----|---------------------------|------------------------------------------------------------------------------------------------------------------------------------------------------------------------------------------------------------------------------------------------------------------------------------------------------------------------------|------------------------------------------------------------------------------------------------------------------------------------------------------------------|---|------------|---|------------|---|----------|
|    |                           | or certain of its affiliated websites. For complete terms and conditions, see <a href="http://www.amazon.com/gc-legal">www.amazon.com/gc-legal</a> . GCs are issued by ACI Gift Cards, Inc., a Washington corporation. All Amazon ®, ™ & © are IP of Amazon.com, Inc. or its affiliates. No expiration date or service fees. |                                                                                                                                                                  |   |            |   |            |   |          |
| 85 | amazon_gift_card_complete | Complete?                                                                                                                                                                                                                                                                                                                    | dropdown <table border="1"> <tr> <td>0</td> <td>Incomplete</td> </tr> <tr> <td>1</td> <td>Unverified</td> </tr> <tr> <td>2</td> <td>Complete</td> </tr> </table> | 0 | Incomplete | 1 | Unverified | 2 | Complete |
| 0  | Incomplete                |                                                                                                                                                                                                                                                                                                                              |                                                                                                                                                                  |   |            |   |            |   |          |
| 1  | Unverified                |                                                                                                                                                                                                                                                                                                                              |                                                                                                                                                                  |   |            |   |            |   |          |
| 2  | Complete                  |                                                                                                                                                                                                                                                                                                                              |                                                                                                                                                                  |   |            |   |            |   |          |
