# Supplementary material for: Internet-Based Assessment of Oncology Health Care Professional Learning Style and Optimization of Materials for Web-Based Learning: Controlled Trial With Concealed Allocation
Source: PubMed Central journal article supplement (PMC5548983; doi:10.2196/jmir.7506), 2017-07-25
Supplement: jmir_v19i7e265_app7.pdf [file jmir_v19i7e265_app7.pdf]

## Multimedia Appendix 7

### Feedback Survey Results

**Table 1.** Results of the question, "was the information easy to understand?" by arm and learning style.

| Participant Group (N)                | Was the Information Easy to Understand? n (%) |          |                            |            |                |
|--------------------------------------|-----------------------------------------------|----------|----------------------------|------------|----------------|
|                                      | Strongly Disagree                             | Disagree | Neither Agree Nor Disagree | Agree      | Strongly Agree |
| Control (292)                        | 10 (3.4)                                      | 19 (6.5) | 41 (14.0)                  | 170 (58.2) | 52 (17.8)      |
| Intervention (253)                   | 18 (7.1)                                      | 13 (5.1) | 19 (7.5)                   | 127 (50.2) | 76 (30.0)      |
| Watching (19)                        | 0 (0)                                         | 4 (21)   | 3 (16)                     | 8 (42)     | 4 (21)         |
| Listening (12)                       | 1 (8)                                         | 1 (8)    | 1 (8)                      | 7 (58)     | 2 (17)         |
| Reading (80)                         | 2 (3)                                         | 6 (8)    | 8 (10)                     | 41 (51)    | 23 (29)        |
| Watching & Listening (53)            | 4 (8)                                         | 2 (4)    | 2 (4)                      | 31 (59)    | 14 (26)        |
| Watching & Reading (101)             | 3 (3.0)                                       | 5 (5.0)  | 6 (5.9)                    | 65 (64.4)  | 22 (21.8)      |
| Listening & Reading (67)             | 5 (8)                                         | 1 (2)    | 11 (16)                    | 38 (57)    | 12 (18)        |
| Watching & Listening & Reading (213) | 13 (6.1)                                      | 13 (6.1) | 29 (13.6)                  | 107 (50.2) | 51 (23.9)      |

**Table 2.** Results of the question, "was the information confusing?" by arm and learning style.

| Participant Group (N)     | Was the Information Confusing? n (%) |            |                            |            |                |
|---------------------------|--------------------------------------|------------|----------------------------|------------|----------------|
|                           | Strongly Disagree                    | Disagree   | Neither Agree Nor Disagree | Agree      | Strongly Agree |
| Control (291)             | 20 (6.9)                             | 97 (33.3)  | 61 (21.0)                  | 105 (36.1) | 8 (2.8)        |
| Intervention (252)        | 39 (15.5)                            | 105 (41.7) | 47 (18.6)                  | 55 (21.8)  | 6 (2.4)        |
| Watching (19)             | 3 (16)                               | 7 (37)     | 4 (21)                     | 5 (26)     | 0 (0)          |
| Listening (12)            | 1 (8)                                | 3 (25)     | 1 (8)                      | 7 (58)     | 0 (0)          |
| Reading (82)              | 12 (15)                              | 30 (37)    | 17 (21)                    | 22 (27)    | 1 (1)          |
| Watching & Listening (52) | 8 (15)                               | 18 (35)    | 13 (25)                    | 12 (23)    | 1 (2)          |
| Watching & Reading (100)  | 8 (8.0)                              | 38 (38.0)  | 20 (20.0)                  | 30 (30.0)  | 4 (4.0)        |
| Listening & Reading (66)  | 4 (6)                                | 27 (41)    | 13 (20)                    | 21 (32)    | 1 (2)          |

|                                      |           |           |           |           |         |
|--------------------------------------|-----------|-----------|-----------|-----------|---------|
| Watching & Listening & Reading (212) | 23 (10.8) | 79 (37.3) | 40 (18.9) | 63 (29.7) | 7 (3.3) |
|--------------------------------------|-----------|-----------|-----------|-----------|---------|

**Table 3.** Results of the question, "was the information satisfying?" by arm and learning style.

| Participant Group (N)                | Was the Information Satisfying? n (%) |          |                            |            |                |
|--------------------------------------|---------------------------------------|----------|----------------------------|------------|----------------|
|                                      | Strongly Disagree                     | Disagree | Neither Agree Nor Disagree | Agree      | Strongly Agree |
| Control (294)                        | 4 (1.4)                               | 15 (5.1) | 54 (18.4)                  | 175 (59.5) | 46 (15.6)      |
| Intervention (252)                   | 13 (5.2)                              | 6 (2.4)  | 18 (7.1)                   | 150 (59.5) | 65 (25.8)      |
| Watching (19)                        | 0 (0)                                 | 2 (11)   | 3 (16)                     | 10 (53)    | 4 (21)         |
| Listening (12)                       | 1 (8)                                 | 0 (0)    | 2 (17)                     | 7 (58)     | 2 (17)         |
| Reading (82)                         | 1 (1)                                 | 3 (4)    | 10 (12)                    | 50 (61)    | 18 (22)        |
| Watching & Listening (53)            | 0 (0)                                 | 0 (0)    | 10 (19)                    | 33 (62)    | 10 (19)        |
| Watching & Reading (101)             | 2 (2.0)                               | 7 (6.9)  | 9 (8.9)                    | 61 (60.4)  | 22 (21.8)      |
| Listening & Reading (67)             | 2 (3)                                 | 1 (2)    | 9 (13)                     | 45 (67)    | 10 (15)        |
| Watching & Listening & Reading (212) | 11 (5.2)                              | 8 (3.8)  | 29 (13.7)                  | 119 (56.1) | 42 (21.2)      |

**Table 4.** Results of the question, "was the information new?" by arm and learning style.

| Participant Group (N)                | Was the Information New? n (%) |          |                            |            |                |
|--------------------------------------|--------------------------------|----------|----------------------------|------------|----------------|
|                                      | Strongly Disagree              | Disagree | Neither Agree Nor Disagree | Agree      | Strongly Agree |
| Control (293)                        | 5 (1.7)                        | 1 (0.3)  | 25 (8.5)                   | 173 (59.0) | 89 (30.4)      |
| Intervention (252)                   | 10 (4.0)                       | 4 (1.6)  | 11 (4.4)                   | 127 (50.4) | 100 (39.7)     |
| Watching (19)                        | 0 (0)                          | 1 (5)    | 2 (11)                     | 10 (53)    | 6 (32)         |
| Listening (12)                       | 1 (8)                          | 0 (0)    | 2 (17)                     | 7 (58)     | 2 (17)         |
| Reading (82)                         | 1 (1)                          | 2 (2)    | 7 (9)                      | 44 (54)    | 28 (34)        |
| Watching & Listening (52)            | 0 (0)                          | 0 (0)    | 2 (4)                      | 34 (65)    | 16 (31)        |
| Watching & Reading (101)             | 3 (3.0)                        | 0 (0.0)  | 5 (5.0)                    | 60 (59.4)  | 33 (32.7)      |
| Listening & Reading (67)             | 2 (3)                          | 0 (0)    | 2 (3)                      | 39 (58)    | 24 (36)        |
| Watching & Listening & Reading (212) | 8 (3.8)                        | 2 (0.9)  | 16 (7.6)                   | 106 (50.0) | 80 (37.7)      |

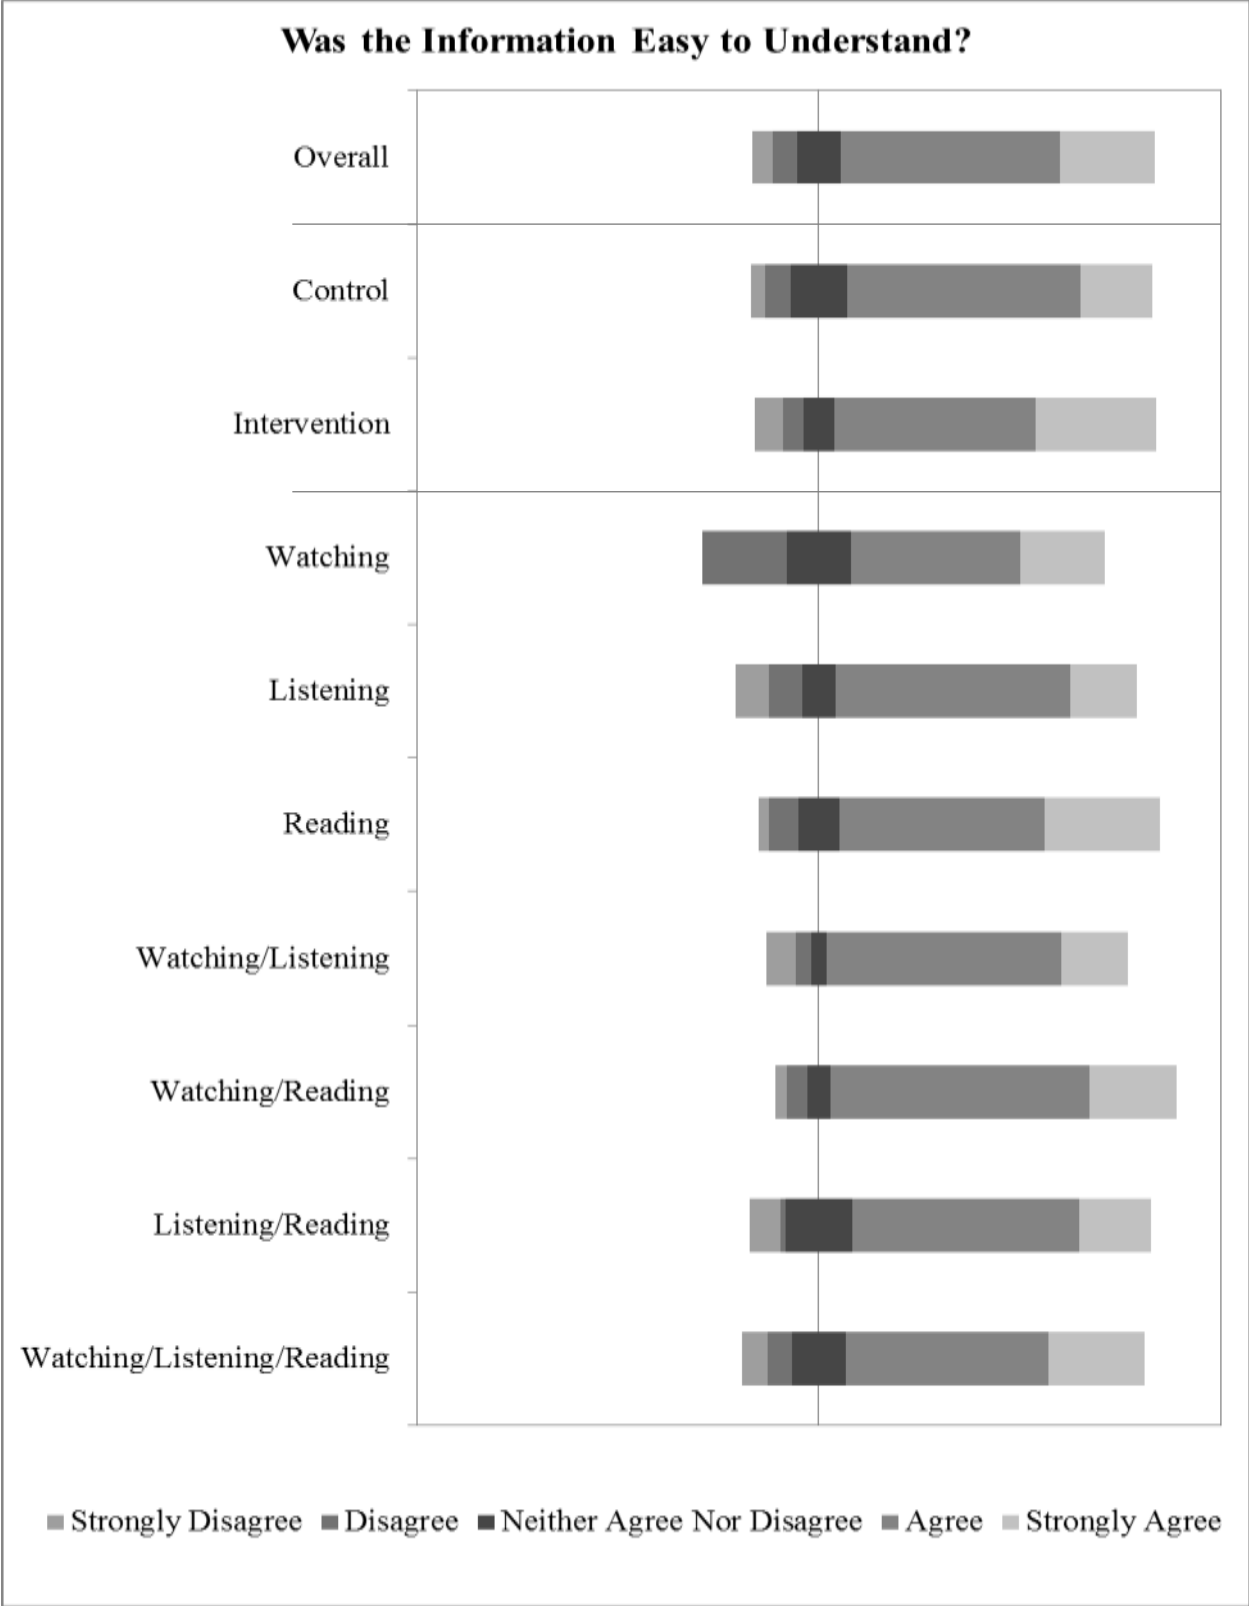

**Figure 1.** Feedback survey results on question "was the information easy to understand," by study arm and learning style.

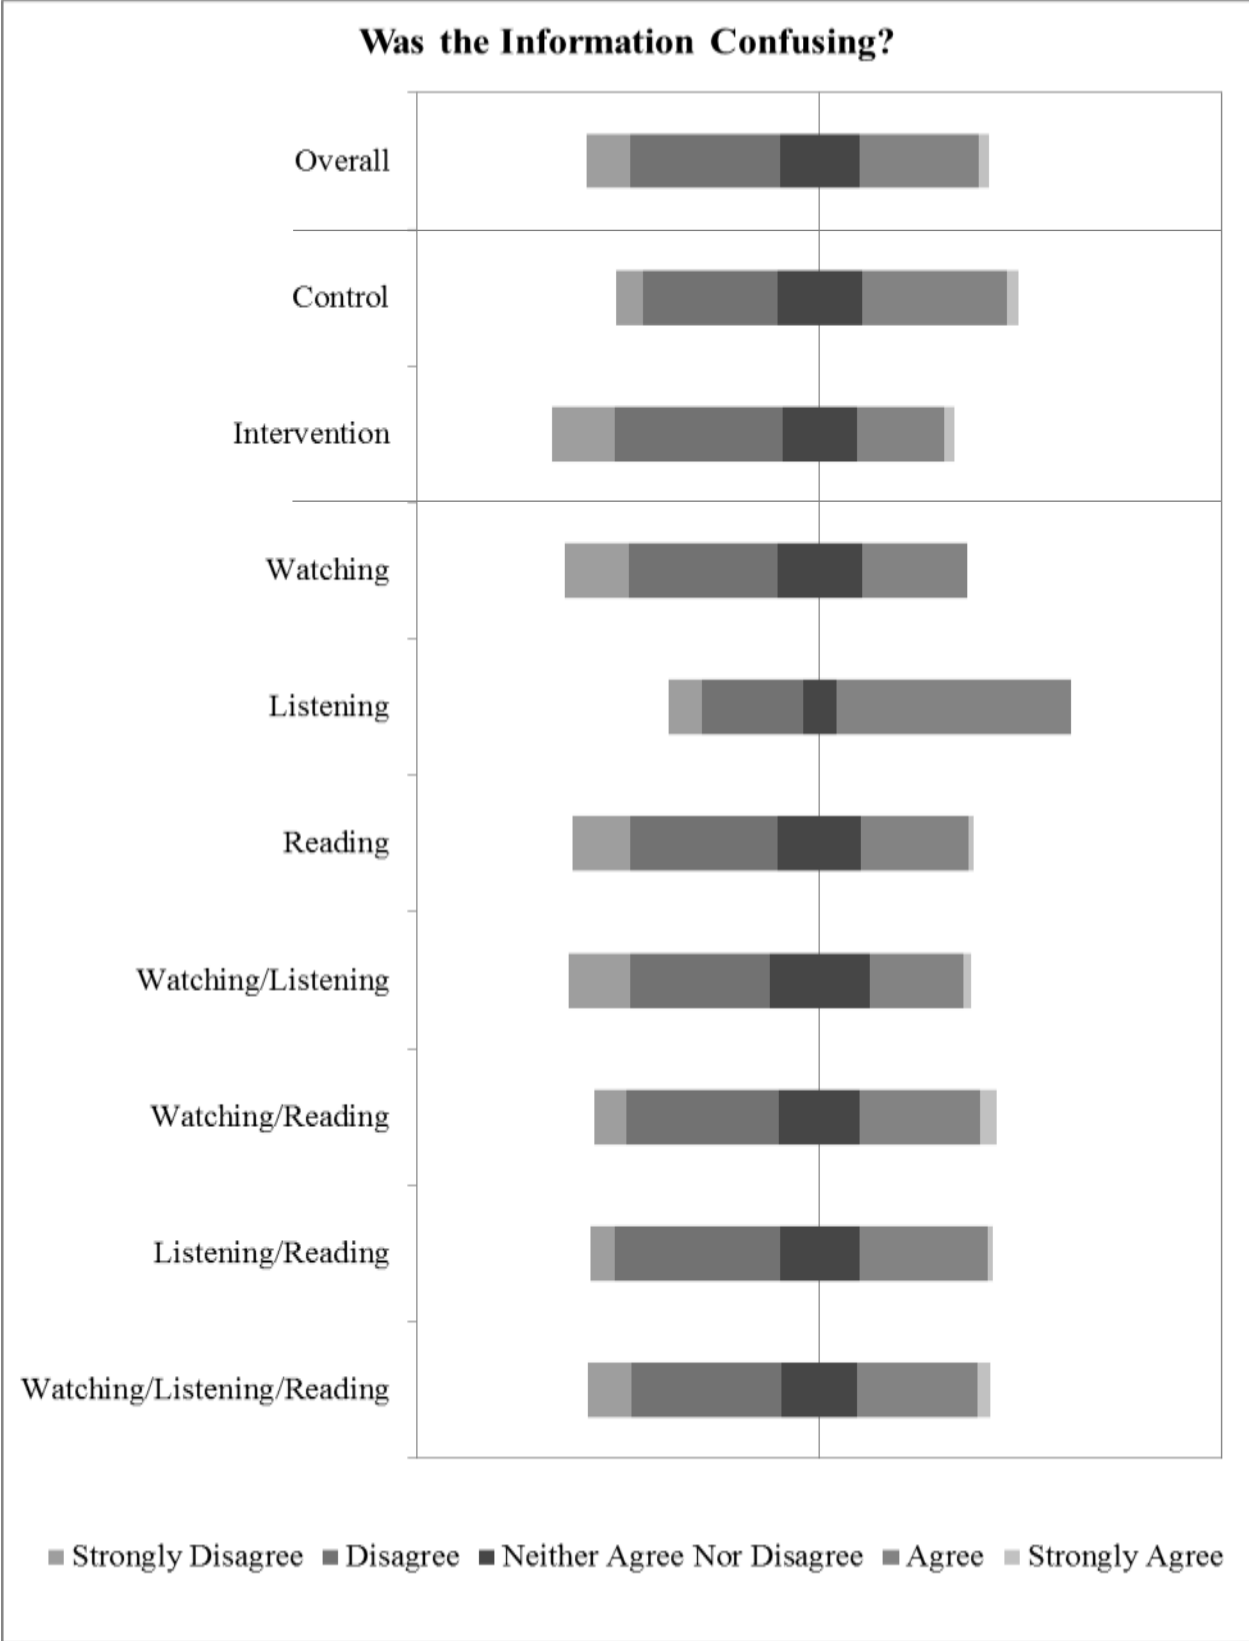

**Figure 2.** Feedback survey results on question "was the information confusing," by study arm and learning style.

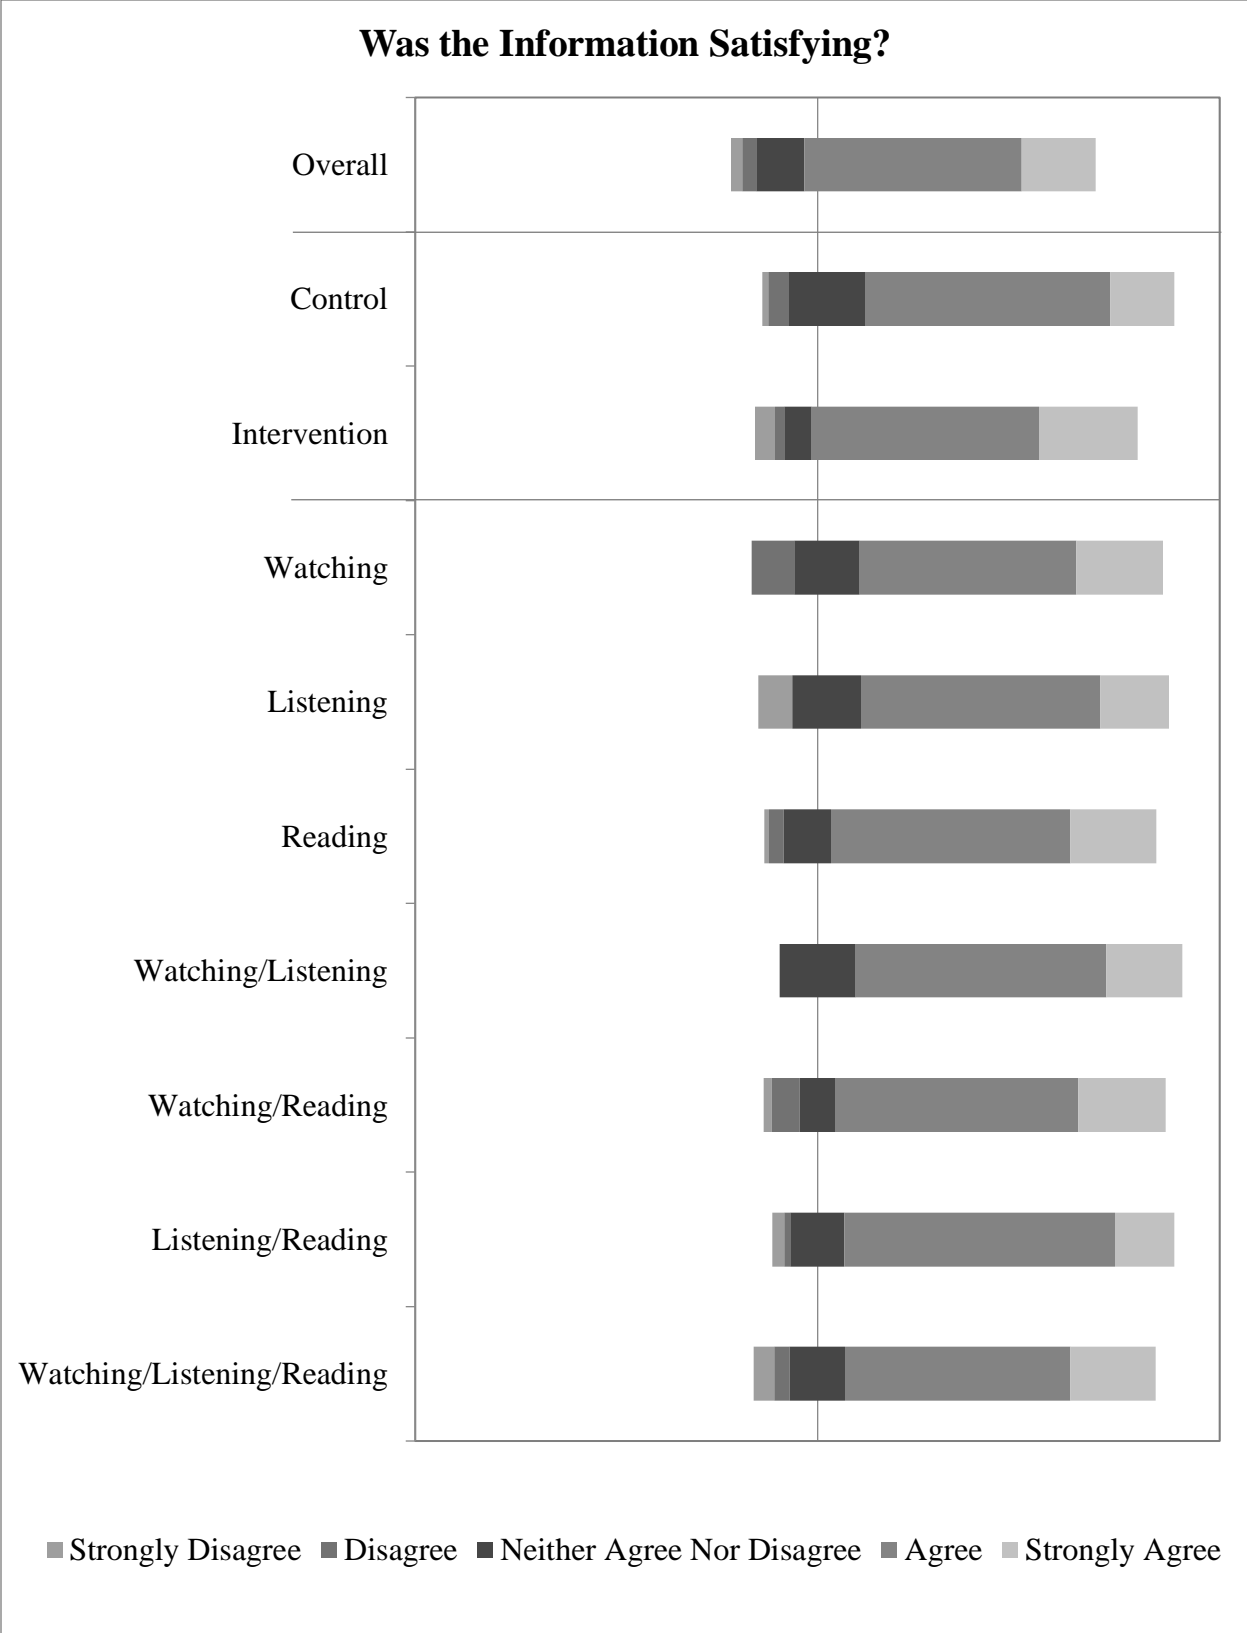

**Figure 3.** Feedback survey results on question "was the information satisfying," by study arm and learning style.

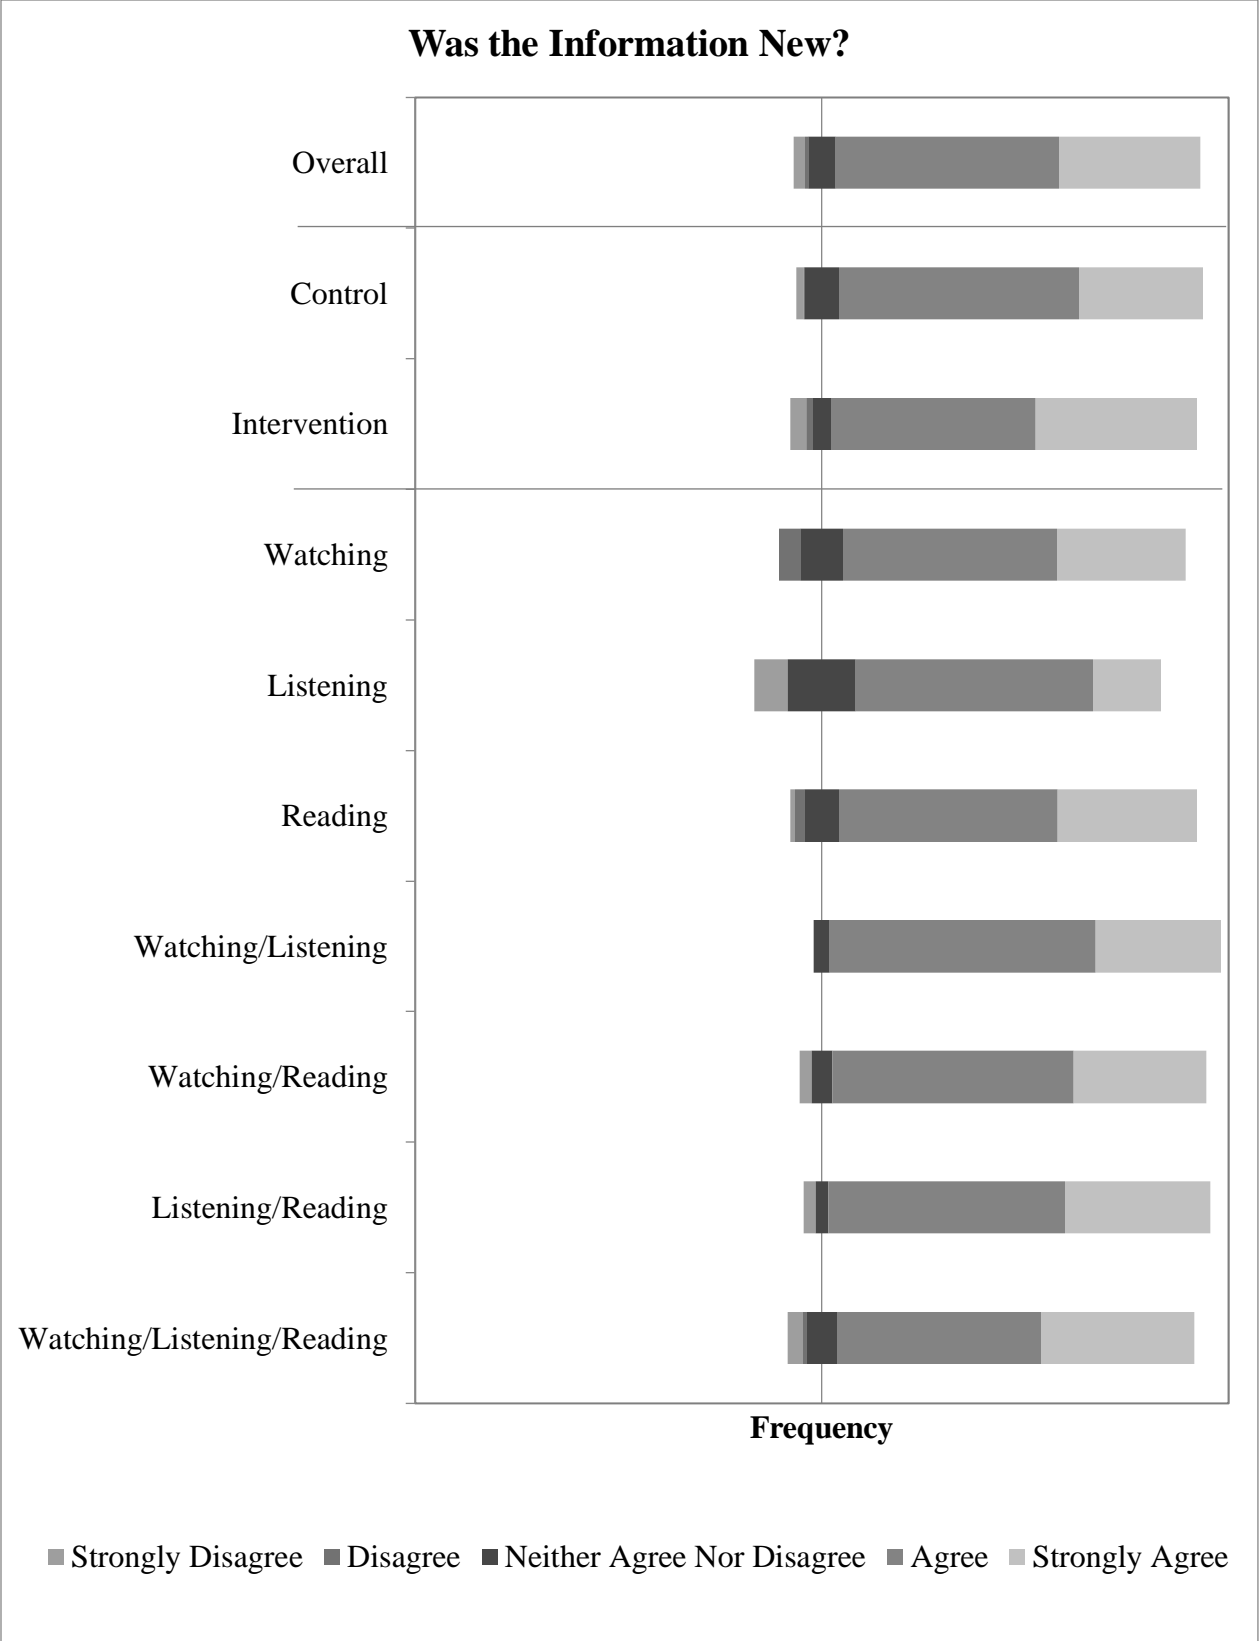

**Figure 4.** Feedback survey results on question "was the information new," by study arm and learning style.
