# Supplementary material for: Internet-Based Assessment of Oncology Health Care Professional Learning Style and Optimization of Materials for Web-Based Learning: Controlled Trial With Concealed Allocation
Source: PubMed Central journal article supplement (PMC5548983; doi:10.2196/jmir.7506), 2017-07-25
Supplement: jmir_v19i7e265_app8.pdf [file jmir_v19i7e265_app8.pdf]

## Multimedia Appendix 8

### Variance Analysis and Parameter Estimates

**Table 1.** Analysis of variance for knowledge posttest score regression model.

| Variable                               | <i>df</i> | Partial SS | MS      | F      | <i>P</i> |
|----------------------------------------|-----------|------------|---------|--------|----------|
| Knowledge pretest score                | 1         | 293.033    | 293.033 | 114.58 | <.0001   |
| Group                                  | 1         | 21.365     | 21.365  | 8.35   | 0.0040   |
| Practice type                          | 2         | 10.137     | 5.069   | 1.98   | 0.1388   |
| Percentage breast cancer patients seen | 3         | 14.325     | 4.775   | 1.87   | 0.1341   |
| Age                                    | 1         | 0.864      | 0.864   | 0.34   | 0.5613   |
| Gender                                 | 1         | 2.387      | 2.387   | 0.93   | 0.3344   |
| Race                                   | 2         | 1.745      | 0.872   | 0.34   | 0.7111   |
| Physician specialty                    | 6         | 27.199     | 4.533   | 1.77   | 0.1026   |
| REGRESSION                             | 17        | 347.448    | 20.438  | 7.99   | <.0001   |
| ERROR                                  | 534       | 1365.636   | 2.557   |        |          |

NOTE: *df* = degrees of freedom; partial SS = variation, sum of squares; MS = mean of the squares ( $MS = SS/df$ ); F = F test statistic ( $F = MS/MS_{ERROR}$ ); *P* = *P*-value.

**Table 2.** Parameter estimates for knowledge posttest score regression model.

| Variable                                                         | Coef   | S.E.  | t      | <i>P</i> |
|------------------------------------------------------------------|--------|-------|--------|----------|
| Intercept                                                        | 5.599  | 0.521 | 10.747 | <0.001   |
| Knowledge pretest score                                          | 0.358  | 0.033 | 10.704 | <0.001   |
| Group = intervention                                             | 0.401  | 0.139 | 2.890  | 0.004    |
| Practice type = community                                        | -0.176 | 0.169 | -1.042 | 0.2980   |
| Practice type = both/other                                       | -0.500 | 0.255 | -1.960 | 0.0500   |
| Percentage breast cancer patients seen = 25-50 percent           | -0.022 | 0.171 | -0.129 | 0.8970   |
| Percentage breast cancer patients seen = greater than 50 percent | -0.511 | 0.226 | -2.264 | 0.0240   |
| Percentage breast cancer patients seen = unknown                 | -0.284 | 0.520 | -0.546 | 0.5850   |
| Age                                                              | -0.005 | 0.008 | -0.581 | 0.5610   |
| Gender = female                                                  | 0.152  | 0.158 | 0.966  | 0.3340   |
| Race = Asian                                                     | -0.151 | 0.196 | -0.770 | 0.4410   |
| Race = other/multiracial                                         | -0.123 | 0.308 | -0.399 | 0.6900   |
| Physician specialty = fellow                                     | 0.767  | 0.455 | 1.686  | 0.0920   |
| Physician specialty = medical oncologist and/or hematologist     | 0.455  | 0.416 | 1.091  | 0.2750   |
| Physician specialty = surgical oncologist                        | 1.177  | 0.555 | 2.121  | 0.0340   |
| Physician specialty = radiation oncologist                       | 0.896  | 0.453 | 1.980  | 0.0480   |
| Physician specialty = pathologist                                | 0.630  | 0.508 | 1.239  | 0.2150   |
| Physician specialty = None of the above                          | 1.069  | 0.628 | 1.702  | 0.0890   |

NOTE: coef = regression coefficient; S.E. = standard error of the regression coefficient; t = t statistic; *P* = *P*-value.

**Table 3.** Analysis of variance for knowledge follow-up test score regression model.

| Variable                               | <i>df</i> | Partial SS | MS      | F      | <i>P</i> |
|----------------------------------------|-----------|------------|---------|--------|----------|
| Knowledge pretest score                | 1         | 376.822    | 376.822 | 154.44 | <.0001   |
| Group                                  | 1         | 14.225     | 14.225  | 5.83   | 0.0161   |
| Practice type                          | 2         | 5.335      | 2.667   | 1.09   | 0.3359   |
| Percentage breast cancer patients seen | 3         | 0.970      | 0.323   | 0.13   | 0.9407   |
| Age                                    | 1         | 0.121      | 0.121   | 0.05   | 0.8240   |
| Gender                                 | 1         | 2.091      | 2.091   | 0.86   | 0.3550   |
| Race                                   | 2         | 2.269      | 1.134   | 0.46   | 0.6284   |
| Physician specialty                    | 6         | 14.069     | 2.345   | 0.96   | 0.4510   |
| REGRESSION                             | 17        | 456.446    | 26.850  | 11.00  | <.0001   |
| ERROR                                  | 534       | 1302.936   | 2.440   |        |          |

NOTE: *df* = degrees of freedom; partial SS = variation, sum of squares; MS = mean of the squares ( $MS = SS/df$ ); F = F test statistic ( $F = MS/MS_{ERROR}$ ); *P* = *P*-value.

**Table 4.** Parameter estimates for knowledge follow-up test score regression model.

| Variable                                                         | Coef   | S.E.  | t      | <i>P</i> |
|------------------------------------------------------------------|--------|-------|--------|----------|
| Intercept                                                        | 4.376  | 0.505 | 8.668  | <0.001   |
| Knowledge pretest score                                          | 0.404  | 0.033 | 12.427 | <0.001   |
| Group = intervention                                             | 0.327  | 0.135 | 2.415  | 0.016    |
| Practice type = community                                        | -0.190 | 0.164 | -1.154 | 0.2490   |
| Practice type = both/other                                       | -0.317 | 0.248 | -1.279 | 0.2010   |
| Percentage breast cancer patients seen = 25-50 percent           | -0.103 | 0.170 | -0.607 | 0.5440   |
| Percentage breast cancer patients seen = greater than 50 percent | -0.072 | 0.224 | -0.320 | 0.7490   |
| Percentage breast cancer patients seen = unknown                 | 0.005  | 0.508 | 0.009  | 0.9920   |
| Age                                                              | 0.002  | 0.008 | 0.222  | 0.8240   |
| Gender = female                                                  | 0.142  | 0.153 | 0.926  | 0.3550   |
| Race = Asian                                                     | -0.124 | 0.181 | -0.686 | 0.4930   |
| Race = other/multiracial                                         | -0.242 | 0.293 | -0.825 | 0.4090   |
| Physician specialty = fellow                                     | 0.908  | 0.459 | 1.981  | 0.0480   |
| Physician specialty = medical oncologist and/or hematologist     | 0.588  | 0.411 | 1.431  | 0.1520   |
| Physician specialty = surgical oncologist                        | 0.556  | 0.563 | 0.988  | 0.3230   |
| Physician specialty = radiation oncologist                       | 0.536  | 0.436 | 1.230  | 0.2190   |
| Physician specialty = pathologist                                | 0.531  | 0.496 | 1.071  | 0.2840   |
| Physician specialty = None of the above                          | 1.179  | 0.607 | 1.944  | 0.0520   |

NOTE: coef = regression coefficient; S.E. = standard error of the regression coefficient; t = t statistic; *P* = *P*-value.
